# Supplementary material
Source: ML conference proceedings conference paper supplement (https://openreview.net/forum?id=e4xS9ZarDr)
Supplement: supplementary_material [file attachment]

## A EXAMPLES OF $\mathcal{K}$

We provide a list of examples of  $\mathcal{K}$  and the corresponding  $\nabla\mathcal{K}$  and  $\mathcal{K}^*$ . It is useful to define the following indicator functions of set  $\{z = 0\}$ :

$$\delta(z) = \begin{cases} 0 & \text{if } z = 0 \\ +\infty & \text{if } z \neq 0. \end{cases}, \quad \mathbb{I}(z) = \begin{cases} 0 & \text{if } z = 0 \\ 1 & \text{if } z \neq 0. \end{cases},$$

Note that  $\delta$  is the conjugate function of  $f(x) = x$ , as  $\delta(x) = \sup_z x^\top z$ .

**$\ell_p$  norm** When  $\mathcal{K}(x) = \|x\|_p = (\sum_i |x_i|^p)^{1/p}$  for  $p \geq 1$ , we can take

$$\nabla\mathcal{K}(x) = \frac{\text{sign}(x) |x|^{p-1}}{\|x\|_p^{p-1}},$$

and

$$\mathcal{K}^*(x) = \sup_z x^\top z - \|z\|_p = \sup_{c \geq 0} \|x\|_q c - c = \delta(\|x\|_q \leq 1),$$

where  $q$  is the conjugate number of  $p$ , satisfying  $\frac{1}{p} + \frac{1}{q} = 1$ . Hence, Lion- $\mathcal{K}$  with  $\ell_p$  norm correspond to solving

$$\min_x f(x) \quad \text{s.t.} \quad \|x\|_q \leq 1/\lambda.$$

**Group  $\ell_p$  norm** Assume  $x$  is partitioned into a number of groups:  $x = [x_{\mathcal{G}_i}]_{i=1}^k$ . Consider the group  $\ell_p$  norm:  $\mathcal{K}(x) = \sum_{i=1}^k \|x_{\mathcal{G}_i}\|_p$ . Then, we can take

$$\nabla\mathcal{K}(x) = \left[ \frac{\text{sign}(x_{\mathcal{G}_i}) |x_{\mathcal{G}_i}|^{p-1}}{\|x_{\mathcal{G}_i}\|_p^{p-1}} \right]_{i=1}^k$$

The conjugate function is

$$\mathcal{K}^*(x) = \sup_z \sum_{i=1}^k x_{\mathcal{G}_i}^\top z_{\mathcal{G}_i} - \|z_{\mathcal{G}_i}\|_p = \sum_{i=1}^k \delta(\|x_{\mathcal{G}_i}\|_q \leq 1).$$

Hence, Lion- $\mathcal{K}$  with grouped  $\ell_p$  norm corresponds to solving

$$\min_x f(x) \quad \text{s.t.} \quad \|x_{\mathcal{G}_i}\|_q \leq 1/\lambda, \quad \forall i.$$

**Lower Truncated  $\ell_1$  Norm** Consider  $\mathcal{K}(x) = \sum_{i=1}^d \max(|x_i| - e, 0)$  where  $e > 0$ . We can take

$$\nabla\mathcal{K}(x) = \mathbb{I}(|x| \geq e) \text{sign}(x), \quad (16)$$

which uses  $\text{sign}(x)$  as Lion, but zeros out the gradient on the elements with absolute values smaller than  $e$ . The conjugate is

$$\begin{aligned} \mathcal{K}^*(x) &= \sup_z \sum_{i=1}^d (x_i z_i - \max(|z_i| - e, 0)) \\ &= \sup_{z, c} \sum_{i=1}^d (x_i z_i - c_i) \quad \text{s.t.} \quad c_i \geq 0, \quad c \geq |z_i| - e \\ &= \sup_{c \geq 0} \sum_{i=1}^d |x_i| (c_i + e) - c_i \\ &= \sum_{i=1}^d \delta(|x_i| \leq 1) + e |x_i| \\ &= \delta(\|x\|_\infty \leq 1) + e \|x\|_1. \end{aligned}$$

Hence, Lion- $\mathcal{K}$  corresponds to solving

$$\min_x \alpha f(x) + e\gamma \|x\|_1 \quad \text{s.t.} \quad \|x\|_\infty \leq 1/\lambda. \quad (17)$$

Hence, truncating the small gradients in Lion induces an  $\ell_1$  penalty, which encourages the sparsity of the final solution.

**Lower (Vector-wise) Truncated  $\ell_p$  Norm** Consider  $\mathcal{K}(x) = \max(\|x\|_p - e, 0)$ . We have

$$\nabla \mathcal{K}(x) = \mathbb{I}(\|x\|_p - e \geq 0) \frac{\text{sign}(x) |x|^{p-1}}{\|x\|_p^{p-1}},$$

in which the gradient is zeroed out when  $\|x\|_p \leq e$ . The conjugate is

$$\begin{aligned} \mathcal{K}^*(x) &= \sup_z (x^\top z - \max(\|z\|_p - e, 0)) \\ &= \sup_{z, c} (x^\top z - c) \quad \text{s.t.} \quad c \geq 0, \quad c \geq \|z\|_p - e \\ &= \sup_{c \geq 0} \|x\|_q (c + e) - c \\ &= \delta(\|x\|_q \leq 1) + e \|x\|_q. \end{aligned}$$

Hence, Lion- $\mathcal{K}$  corresponds to solving

$$\min_x \alpha f(x) + e\gamma \|x\|_q \quad \text{s.t.} \quad \|x\|_q \leq 1/\lambda.$$

**Sorting Norm** For  $x = [x_1, \dots, x_d]$ , let  $|x_{(1)}| \geq |x_{(2)}| \dots$  be the sorting of the elements by absolute values. Define

$$\text{Sorting norm:} \quad \mathcal{K}(x) = \sum_i c_i |x_{(i)}|,$$

where  $c_1 \geq c_2 \geq \dots \geq 0$  is a descending non-negative sequence. The sorting norm is convex because it can be represented as the supreme of a set of convex functions, by the rearrangement inequality, as follows

$$\mathcal{K}(x) = \max_{\sigma \in \Gamma} \sum_{i=1}^d c_{\sigma(i)} |x_i|,$$

where  $\Gamma$  denotes the set of permutations on  $\{1, \dots, n\}$ . One subgradient of  $\mathcal{K}$  is

$$\nabla \mathcal{K}(x)_i = c_{\text{rank}(i, x)} \text{sign}(x_i),$$

where  $\text{rank}(i, x)$  denotes the rank of  $|x_i|$  in  $x$ .

$$\begin{aligned} \mathcal{K}^*(x) &= \sup_z \left\{ x^\top z - \sum_i c_i |z_{(i)}| \right\} \\ &= \sup_{z \geq 0} \left\{ \sum_i |x_{(i)}| \times z_{(i)} - \sum_i c_i z_{(i)} \right\} \quad // \text{by rearrangement inequality} \\ &= \sup_{w \geq 0} \left\{ \sum_i (|x_{(i)}| - c_i) \times \left( \sum_{j \geq i} w_j \right) \right\} \quad // \text{let } z_{(i)} = \sum_{j \geq i} w_j, w_j \geq 0 \\ &= \sup_{w \geq 0} \left\{ \sum_j \sum_{i \leq j} (|x_{(i)}| - c_i) \times w_j \right\} \quad // \text{let } z_{(i)} = \sum_{j \geq i} w_j, w_j \geq 0 \\ &= \sum_j \delta \left( \sum_{i \leq j} |x_{(i)}| \leq \sum_{j \leq i} c_j \right) \end{aligned}$$

Hence, Lion- $\mathcal{K}$  corresponds to imposing a sequence of bounds on the cumsum of the sorted  $x$ :

$$\min_x f(x) \quad \text{s.t.} \quad \sum_{j \leq i} |x_{(j)}| \leq C_i, \quad \text{where } C_i = \sum_{j \leq i} c_j.$$

An interesting special case is when  $c_i = \mathbb{I}(i \leq i^{\text{cut}})$  for some integer  $i^{\text{cut}} \in \{1, \dots, d\}$ , so that

$$\mathcal{K}(x) = \sum_{i \leq i^{\text{cut}}} |x_{(i)}|, \quad \nabla \mathcal{K}(x) = \mathbb{I}(|x| \geq x_{(i^{\text{cut}})}) \text{sign}(x),$$

in which we zero out the updates of the elements whose absolute values are smaller than the  $i^{\text{cut}}$ -th largest element. It is useful to compare this with (16) which applies the truncation based on a fixed number  $\epsilon$ , rather than the percentile.

The conjugate is

$$\mathcal{K}^*(x) = \sum_{j \leq i^{\text{cut}}} \delta(|x_{(j)}| \leq 1) + \delta(\|x\|_1 \leq i^{\text{cut}})$$

Then, Lion- $\mathcal{K}$  in this case corresponds to solving

$$\min_x f(x) \quad \text{s.t.} \quad \|x\|_1 \leq i^{\text{cut}}/\lambda, \quad \|x\|_\infty \leq 1/\lambda,$$

in which the percentile-based truncation effectively imposes a constraint on the  $\ell_1$  norm of  $x$ . It is different from (17) in which the  $\ell_1$  norm appears as a regularization term in the objective, rather than as a hard constraint.

**Entropy** Consider  $\mathcal{K}(x) = \sum_{i=1}^d \frac{1}{a} \log(\frac{1}{2}(\exp(ax_i) + \exp(-ax_i)))$ , where  $a > 0$ . We have

$$\nabla \mathcal{K}(x) = \frac{\exp(ax) - \exp(-ax)}{\exp(ax) + \exp(-ax)} = \tanh(ax).$$

Taking the inverse, we have  $\nabla \mathcal{K}^*(x) = \frac{1}{2a} \log \frac{1+x}{1-x}$ , with domain in  $\|x\|_\infty \leq 1$ . by integration, the conjugate function is hence,

$$\mathcal{K}^*(x) = \sum_{i=1}^d \frac{1}{2a} (x_i + 1) \log(x_i + 1) + \frac{1}{2a} (1 - x_i) \log(1 - x_i) + \delta(\|x\|_\infty < 1).$$

Lion- $\mathcal{K}$  correspond to solving an entropy-regularized optimization:

$$\min_x \alpha f(x) + \frac{\gamma}{\lambda} E(\lambda x) \quad \text{s.t.} \quad \|x\|_\infty \leq 1/\lambda,$$

where  $E(x) = \sum_{i=1}^d \frac{1}{2a} (x_i + 1) \log(x_i + 1) + \frac{1}{2a} (1 - x_i) \log(1 - x_i)$ .

**Huber Loss** For  $a \geq 0$ , define the Huber loss:

$$\mathcal{K}(x) = \sum_{i=1}^d \text{Huber}_a(x_i) \quad \text{where} \quad \text{Huber}_a(x_i) = \mathbb{I}(|x_i| \geq a) \times |x_i| + \mathbb{I}(|x_i| < a) \times \frac{1}{2a} x_i^2,$$

We have

$$\nabla \mathcal{K}(x) = \text{Clip}(x, -a, a)/a, \quad \text{with} \quad \text{Clip}(x_i, a, b) = \begin{cases} x_i & \text{if } x \in [a, b] \\ b & \text{if } x > b \\ a & \text{if } x < a. \end{cases}$$

The conjugate is

$$\mathcal{K}^*(x) = \frac{a}{2} \|x\|_2^2 + \delta(\|x\|_\infty \leq 1),$$

$$\begin{aligned} \mathcal{K}^*(x) &= \sum_{i=1}^d \max\left(\sup_{|z| \geq a} x_i z_i - |z_i|, \sup_{|z_i| < a} x_i z_i - \frac{1}{2a} z_i^2\right) \\ &= \sum_{i=1}^d \max\left(\delta(|x_i| \leq 1) + a(|x_i| - 1), \frac{1}{2} a x_i^2\right) \\ &= \sum_{i=1}^d \delta(|x_i| \leq 1) + \frac{1}{2} a x_i^2 \\ &= \frac{a}{2} \|x\|_2^2 + \delta(\|x\|_\infty \leq 1). \end{aligned}$$

**Relativistic** Consider  $\mathcal{K}(x) = \sum_{i=1}^d \sqrt{x_i^2 + e^2}$ , then  $\nabla \mathcal{K}(x) = \frac{x}{\sqrt{x^2 + e^2}}$ , and

$$\begin{aligned} \mathcal{K}^*(x) &= \sup_z \left( \sum_{i=1}^d x_i z_i - \sqrt{z_i^2 + e^2} \right) \\ &= \sum_{i=1}^d \frac{x_i^2 e}{\sqrt{1 - x_i^2}} - \frac{e}{\sqrt{1 - x_i^2}} \quad //\text{Solution: } z_i^2 = \frac{x_i^2 e^2}{1 - x_i^2} \\ &= \sum_{i=1}^d -e \sqrt{1 - x_i^2} + \delta(|x_i| \leq 1) \\ &= \sum_{i=1}^d -e \sqrt{1 - x_i^2} + \delta(\|x\|_\infty \leq 1). \end{aligned}$$

A related case is

$$\mathcal{K}(x) = |x| - e \log(|x|/e + 1), \quad \text{with} \quad \nabla \mathcal{K}(x) = \frac{x}{|x| + e},$$

whose conjugate function is

$$\begin{aligned} \mathcal{K}^*(x) &= \sup_x \left( \sum_{i=1}^d x_i z_i - |z_i| + e \log(|z_i|/e + 1) \right) \\ &= \sum_{i=1}^d |x_i|^2 e / (1 - |x_i|) - |x_i| e / (1 - |x_i|) + e \log(1 / (1 - |x_i|)) \quad //\text{Solution: } z = |x| e / (1 - |x|) \\ &= \sum_{i=1}^d -e(|x_i| + \log(1 - |x_i|)) + \delta(\|x\|_\infty < 1). \end{aligned}$$

## B PROOFS

### B.1 CONVEX FUNCTION PRELIMINARIES

**Lemma 2.1** Assume  $\mathcal{K}, \mathcal{K}^*$  is a closed convex conjugate pair and  $\nabla \mathcal{K}, \nabla \mathcal{K}^*$  are their subgradients, we have

$$(\nabla \mathcal{K}(x) - \nabla \mathcal{K}(y))^\top (x - y) \geq 0, \quad (\nabla \mathcal{K}(x) - y)^\top (x - \nabla \mathcal{K}^*(y)) \geq 0. \quad (18)$$

*Proof.* 1) By definition of subgradient, we have

$$\begin{aligned} \mathcal{K}(y) - \mathcal{K}(x) &\geq \nabla \mathcal{K}(x)^\top (y - x) \\ \mathcal{K}(x) - \mathcal{K}(y) &\geq \nabla \mathcal{K}(y)^\top (x - y). \end{aligned}$$

Summing them together yields  $(\nabla \mathcal{K}(x) - \nabla \mathcal{K}(y))^\top (x - y) \geq 0$ .

2) Because  $\nabla \mathcal{K}^*(y) \in \partial \mathcal{K}^*(y)$ , we have

$$\mathcal{K}^*(\nabla \mathcal{K}(x)) - \mathcal{K}^*(y) \geq \nabla \mathcal{K}^*(y)^\top (\nabla \mathcal{K}(x) - y),$$

Because  $\nabla \mathcal{K}(x) \in \partial \mathcal{K}(x)$ , by the property of conjugate functions, we have  $x \in \partial \mathcal{K}^*(\nabla \mathcal{K}(x))$ , and hence

$$\mathcal{K}^*(y) - \mathcal{K}^*(\nabla \mathcal{K}(x)) \geq x^\top (y - \nabla \mathcal{K}(x)).$$

Summing the two inequalities above yields

$$(\nabla \mathcal{K}(x) - y)^\top (\nabla \mathcal{K}^*(y) - x) \leq (\mathcal{K}^*(\nabla \mathcal{K}(x)) - \mathcal{K}^*(y)) + (\mathcal{K}^*(y) - \mathcal{K}^*(\nabla \mathcal{K}(x))) = 0.$$

□

---

## B.2 CONNECTION WITH NESTEROV MOMENTUM

**Lemma B.1.** *The Lion- $\mathcal{K}$  ODE is*

$$\begin{aligned}\dot{x}_t &= \nabla \mathcal{K}(m_t - \varepsilon(\alpha \nabla f(x_t) + \gamma m_t)) - \lambda x_t \\ \dot{m}_t &= -\alpha \nabla f(x_t) - \gamma m_t.\end{aligned}$$

is equivalent to

$$\nabla^2 \mathcal{K}^*(\dot{x}_t + \lambda x_t)(\ddot{x}_t + \lambda \dot{x}_t) + \varepsilon \alpha \nabla^2 f(x_t) \dot{x}_t + \gamma \nabla \mathcal{K}^*(\dot{x}_t + \lambda x_t) + \alpha \nabla f(x_t) = 0, \quad (19)$$

if  $\mathcal{K}^*$  and  $f$  are second order differentiable.

In particular, if  $\mathcal{K}(x) = \|x\|_2^2/2$ , we have

$$\ddot{x}_t + (\lambda + \gamma) \dot{x}_t + \varepsilon \alpha \nabla^2 f(x_t) \dot{x}_t + \gamma \lambda x_t + \alpha \nabla f(x_t) = 0. \quad (20)$$

This ODE minimizes  $F(x) = \alpha f(x) + \gamma \lambda \|x\|_2^2/2$ .

**Remark** We have the following observations from (21):

- 1) The role of the weight decay  $\lambda$  and momentum damping coefficient  $\gamma$  is symmetric in (21).
- 2) When either the weight decay or momentum damping is turned off, i.e.,  $\gamma \lambda = 0$ , the  $\ell_2$  regularization in  $F(x)$  is turned off, and we have

$$\ddot{x}_t + (\lambda + \gamma) \dot{x}_t + \varepsilon \alpha \nabla^2 f(x_t) \dot{x}_t + \alpha \nabla f(x_t) = 0, \quad (21)$$

which coincides with the *high-resolution* ODE [35] that serves as a continuous-time modeling of Nesterov momentum for minimizing  $f(x)$ .

- 3) The Hessian-dependent damping term  $\nabla^2 f(x_t) \dot{x}_t$  arises due to the gradient enhancement ( $\varepsilon > 0$ ), and it is known to play a key role in Nesterov momentum and acceleration [1, 35]. When we turn off the gradient enhancement ( $\varepsilon = 0$ ), we get

$$\ddot{x}_t + (\lambda + \gamma) \dot{x}_t + \alpha \nabla f(x_t) = 0,$$

which is the ODE for Polayk momentum, the equation of motion of a ball with unit mass moving in a potential field  $\alpha f(x)$  with a friction coefficient  $(\lambda + \gamma)$ .

*Proof.* We want to cancel out  $m_t$ . The first equation yields

$$(1 - \varepsilon \gamma) m_t = (\nabla \mathcal{K}^*(\dot{x}_t + \lambda x_t) + \varepsilon \alpha \nabla f(x_t)). \quad (22)$$

Plugging it into the second equation yields

$$\begin{aligned}(1 - \varepsilon \gamma) \dot{m}_t &= -\alpha(1 - \varepsilon \gamma) \nabla f(x_t) - \gamma (\nabla \mathcal{K}^*(\dot{x}_t + \lambda x_t) + \varepsilon \alpha \nabla f(x_t)) \\ &= -\alpha \nabla f(x_t) - \gamma \nabla \mathcal{K}^*(\dot{x}_t + \lambda x_t).\end{aligned} \quad (23)$$

Combining (22) and (23) yields

$$\frac{d}{dt} (\nabla \mathcal{K}^*(\dot{x}_t + \lambda x_t) + \varepsilon \alpha \nabla f(x_t)) = -\alpha \nabla f(x_t) - \gamma \nabla \mathcal{K}^*(\dot{x}_t + \lambda x_t).$$

Or

$$\nabla^2 \mathcal{K}^*(\dot{x}_t + \lambda x_t)(\ddot{x}_t + \lambda \dot{x}_t) + \varepsilon \alpha \nabla^2 f(x_t) \dot{x}_t + \gamma \nabla \mathcal{K}^*(\dot{x}_t + \lambda x_t) + \alpha \nabla f(x_t) = 0.$$

□

## B.3 DISCRETE-TIME SCHEMES OF LION- $\mathcal{K}$

In the most general form, the Euler approximation of the Lion- $\mathcal{K}$  ODE with step size  $\epsilon$  is

$$\begin{aligned}x_{t+1} &= x_t + \epsilon (\nabla \mathcal{K}(m_t - \varepsilon(\alpha \nabla f(x_t) + \gamma m_t)) - \lambda x_t) \\ m_{t+1} &= m_t - \epsilon (\alpha \nabla f(x_t) + \gamma m_t),\end{aligned} \quad (24)$$

The discrete Lion- $\mathcal{K}$  scheme in (2) is recovered when  $\alpha = \gamma$ ,  $\beta_1 = 1 - \varepsilon\gamma$ ,  $\beta_2 = 1 - \varepsilon\gamma$ . By scaling  $f(x)$  by a positive multiplicative ratio, (2) in fact covers all cases of (24) when  $\gamma \neq 0$ .

When  $\gamma = 0$ , however, (24) reduces to a momentum-undamped variant of Lion- $\mathcal{K}$ :

$$\begin{aligned} \text{Undamped Lion-}\mathcal{K}: \quad & x_{t+1} = x_t + \epsilon(\nabla\mathcal{K}(m_t - \beta_1\nabla f(x_t)) - \lambda x_t) \\ & m_{t+1} = m_t - \beta_2\nabla f(x_t), \end{aligned}$$

which is the Euler approximation of Lion- $\mathcal{K}$  ODE  $\gamma = 0$ , step size  $\epsilon$ , and  $\beta_1 = \varepsilon\alpha$ , and  $\beta_2 = \varepsilon\alpha$ . Due to  $\gamma = 0$ , the undamped Lion- $\mathcal{K}$  amounts to solving  $\min_x f(x)$ , without the regularization  $\mathcal{K}^*(\lambda x)$ .

The connection to Polyak and Nesterov momentum discussed in Section extends to discrete-time forms. From the first equation (24), we have

$$m_t = \frac{1}{1 - \varepsilon\gamma} \left( \nabla\mathcal{K}^* \left( \frac{x_{t+1} - x_t}{\epsilon} + \lambda x_t \right) + \varepsilon\alpha\nabla f(x_t) \right).$$

Plugging it into the second equation of (24), we get

$$\left( \nabla\mathcal{K}^* \left( \frac{x_{t+2} - x_{t+1}}{\epsilon} + \lambda x_{t+1} \right) + \varepsilon\alpha\nabla f(x_{t+1}) \right) = (1 - \varepsilon\gamma) \left( \nabla\mathcal{K}^* \left( \frac{x_{t+1} - x_t}{\epsilon} + \lambda x_t \right) + \varepsilon\alpha\nabla f(x_t) \right) - (1 - \varepsilon\gamma)\varepsilon\alpha\nabla f(x_t).$$

Hence,

$$\nabla\mathcal{K}^* \left( \frac{x_{t+2} - x_{t+1}}{\epsilon} + \lambda x_{t+1} \right) = -\varepsilon\alpha\nabla f(x_{t+1}) + (1 - \varepsilon\gamma)\nabla\mathcal{K}^* \left( \frac{x_{t+1} - x_t}{\epsilon} + \lambda x_t \right) + (\varepsilon - \epsilon)\alpha\nabla f(x_t).$$

When  $\nabla\mathcal{K}^*(x) = x$ , we have

$$x_{t+2} = (1 - \varepsilon\lambda)x_{t+1} - \varepsilon\varepsilon\alpha\nabla f(x_{t+1}) + (1 - \varepsilon\gamma)((x_{t+1} - x_t) + \epsilon\lambda x_t) + \epsilon(\varepsilon - \epsilon)\alpha\nabla f(x_t).$$

It is simplified into

$$x_{t+2} = (1 - \varepsilon^2\lambda\gamma)x_{t+1} - \varepsilon^2\alpha\nabla f(x_{t+1}) + (1 - \varepsilon\gamma)(1 - \varepsilon\lambda)(x_{t+1} - x_t) - \epsilon(\varepsilon - \epsilon)\alpha(\nabla f(x_{t+1}) - \nabla f(x_t)).$$

When  $\varepsilon > \epsilon$  (corresponding to  $\beta_1 < \beta_2$  in Lion- $\mathcal{K}$  (2)), this can be shown to be identical to the Nesterov momentum algorithm for minimizing  $F(x) = \alpha f(x) + \lambda\gamma\|x\|_2^2/2$ . When  $\varepsilon = \epsilon$  (corresponding to  $\beta_1 = \beta_2$  in (2)), it is identical to Polyak momentum.

#### B.4 FRANK-WOLFE AND MIRROR DESCENT

**Frank-Wolfe** When  $\varepsilon\gamma = 1$ , Lion- $\mathcal{K}$  reduces to

$$\dot{x}_t = \nabla\mathcal{K}(-\nabla f(x_t)) - \lambda x_t, \tag{25}$$

where we also set  $\varepsilon\alpha = 1$  without loss of generality. In this case, the ODE monotonically decreases the objective

$$F(x) = f(x) + \frac{1}{\lambda}\mathcal{K}^*(\lambda x),$$

without resorting to an additional Lyapunov function. This can be seen from

$$\frac{d}{dt}F(x_t) = (\nabla f(x_t) + \nabla\mathcal{K}^*(\lambda x_t))^\top (\nabla\mathcal{K}(-\nabla f(x_t)) - \lambda x_t) \leq 0,$$

where the inequality follows Lemma 2.1.

The Euler discretization of (25) is

$$x_{t+1} = x_t + \epsilon(\nabla\mathcal{K}(-\nabla f(x_t)) - \lambda x_t). \tag{26}$$

This can also be derived from conditional gradient descent, or Frank-Wolfe. To see this, recall that the conditional gradient descent update for the  $F(x)$  above is

$$\begin{aligned} y_{t+1} &= \arg \min_x \left\{ \nabla f(x_t)^\top (x - x_t) + \frac{1}{\lambda}\mathcal{K}^*(\lambda x) \right\} \\ x_{t+1} &= x_t + \epsilon_0(y_{t+1} - x_t), \end{aligned}$$

Solving  $y_{t+1}$  yields

$$y_{t+1} = \frac{1}{\lambda}\nabla\mathcal{K}(-\nabla f(x_t)), \quad \text{and hence} \quad x_{t+1} = (1 - \epsilon_0)x_t + \frac{\epsilon_0}{\lambda}\nabla\mathcal{K}(-\nabla f(x_t)).$$

Taking  $\epsilon = \epsilon_0\lambda$  yields (26).

**Dual Space Preconditioning and Mirror Descent** When we further set  $\lambda = 0$  in (26), Lion- $\mathcal{K}$  reduces to

$$x_{t+1} = x_t + \epsilon \nabla \mathcal{K}(-\nabla f(x_t)), \quad (27)$$

When  $\nabla \mathcal{K}(0) = 0$ , Eq. (27) is dual space preconditioning [23], which is closely related to mirror descent [26], for minimizing  $f(x)$ . To see the connection with mirror descent, note that (27) is equivalent to

$$x_{t+1} = x_t + \epsilon \delta_t, \quad \text{with} \quad \delta_t = \arg \min_{\delta} \{ \nabla f(x_t)^\top \delta + \mathcal{K}^*(\delta) \}.$$

Because  $\mathcal{K}^*$  and  $\mathcal{K}$  are differentiable, then  $\nabla \mathcal{K}(0) = 0$  implies  $\nabla \mathcal{K}^*(0) = 0$ , and hence  $\mathcal{K}^*$  achieves the minimum at zero. In this case,  $\mathcal{K}^*(\delta) - \mathcal{K}^*(0)$  can be viewed as a Bregman divergence, and hence justifying the connection of (27) with mirror descent. Recall that the Bregman divergence  $B_h(x \parallel y)$  is the Bregman divergence associated with a convex function  $h: \mathbb{R}^d \rightarrow \mathbb{R}$  is defined as

$$B_h(x \parallel y) = h(x) - h(y) - \nabla h(y)^\top (x - y).$$

With  $\nabla \mathcal{K}^*(0) = 0$ , it is then easy to show

$$\mathcal{K}^*(\delta) - \mathcal{K}^*(0) = B_{\mathcal{K}^*}(\delta \parallel 0) = B_{\mathcal{K}_t^*}(x_t + \epsilon \delta \parallel x_t),$$

where  $\mathcal{K}_t^* = \mathcal{K}^* \left( \frac{x - x_t}{\epsilon} \right)$ .

### B.5 LION- $\mathcal{K}$ WITHOUT GRADIENT ENHANCEMENT ( $\varepsilon = 0$ )

**Theorem B.2.** Consider the ODE of Lion- $\mathcal{K}$ -W without gradient correction:

$$\begin{aligned} \dot{x}_t &= \nabla \mathcal{K}(m_t) - \lambda x_t \\ \dot{m}_t &= -\alpha \nabla f(x_t) - \gamma m_t, \end{aligned} \quad (28)$$

with  $\lambda, \alpha, \gamma > 0$ . Its fixed point is the minimum of

$$\min_x \alpha f(x) + \frac{\gamma}{\lambda} \mathcal{K}^*(\lambda x).$$

It yields the following Lyapunov function:

$$H(x, m) = \alpha f(x) + \frac{\gamma}{\lambda} \mathcal{K}^*(\lambda x) + (\mathcal{K}^*(\lambda x) + \mathcal{K}(m) - \lambda x^\top m).$$

*Proof.* Observe that

$$\begin{aligned} \nabla_x H(x, m) &= \alpha \nabla f(x) + (\gamma + \lambda) \nabla \mathcal{K}^*(\lambda x) - \lambda m \\ \nabla_m H(x, m) &= \nabla \mathcal{K}(m) - \lambda x, \end{aligned}$$

and (28) can be written into

$$\begin{aligned} \dot{x}_t &:= V_x(x_t, m_t) = \nabla_m H(x_t, m_t) \\ \dot{m}_t &:= V_m(x_t, m_t) = -\nabla_x H(x_t, m_t) - \hat{H}_m(x_t, m_t), \end{aligned}$$

with  $\hat{H}_m(x_t, m_t) = (\gamma + \lambda)(m_t - \nabla \mathcal{K}^*(\lambda x_t))$ . By Lemma 2.1, we have

$$\hat{H}_m^\top(\nabla_m H) = (m - \nabla \mathcal{K}^*(\lambda x))^\top (\nabla \mathcal{K}(m) - \lambda x) \geq 0.$$

Then

$$\begin{aligned} \frac{d}{dt} H(x_t, m_t) &= \nabla_x H^\top V_x + \nabla_m H^\top V_m \\ &= \nabla_x H^\top (\nabla_m H) + \nabla_m H^\top (-\nabla_x H - \hat{H}_m) = -\nabla_m H^\top \hat{H}_m \leq 0. \end{aligned}$$

In fact, this ODE has a Hamiltonian + descent structure [22], as it can viewed as a Hamiltonian system damped with a descending force:

$$\begin{bmatrix} \dot{x}_t \\ \dot{m}_t \end{bmatrix} = \underbrace{\begin{bmatrix} +\nabla_m H(x_t, m_t) \\ -\nabla_x H(x_t, m_t) \end{bmatrix}}_{\text{Hamiltonian}} - \underbrace{\begin{bmatrix} 0 \\ (\gamma + \lambda)(m_t - \nabla \mathcal{K}^*(\lambda x_t)) \end{bmatrix}}_{\text{Descent}},$$

where the Hamiltonian component is orthogonal to the gradient  $[\nabla_x H, \nabla_m H]$  of  $H(x, m)$  and preserves the total energy  $H(x, m)$ , and the descent component introduces a damping like effect to decrease the energy  $H(x, m)$ .  $\square$

## B.6 LION- $\mathcal{K}$ WITHOUT WEIGHT DECAY – A HAMILTONIAN + DESCENT DERIVATION

When the weight decay in Lion- $\mathcal{K}$  is turned off ( $\lambda = 0$ ), there is an alternative way to analyze it that is amenable to the Hamiltonian + descent structure in (12).

Recall that the Lion- $\mathcal{K}$  ODE is of the following form when  $\lambda = 0$ :

$$\begin{aligned}\dot{x}_t &= \nabla \mathcal{K}(\tilde{m}_t), & \tilde{m}_t &= m_t - \varepsilon(\alpha \nabla f(x_t) + \gamma m_t) \\ \dot{m}_t &= -\alpha \nabla f(x_t) - \gamma m_t\end{aligned}\tag{29}$$

Assume  $\varepsilon\gamma < 1$ . Define  $\tilde{\mathcal{K}}(m) = \frac{1}{1-\varepsilon\gamma}\mathcal{K}((1-\varepsilon\gamma)m)$ , and the following Lyapunov function:

$$H(x, m) = \alpha f(x) + \tilde{\mathcal{K}}(m) = \alpha f(x) + \frac{1}{1-\varepsilon\gamma}\mathcal{K}((1-\varepsilon\gamma)m).\tag{30}$$

Note that  $\nabla_x H(x, m) = \alpha \nabla f(x)$  and  $\nabla_m H(x, m) = \nabla \mathcal{K}((1-\varepsilon\gamma)m)$ . One can decompose (29) into the following Hamiltonian + descent decomposition:

$$\begin{bmatrix} \dot{x}_t \\ \dot{m}_t \end{bmatrix} = \underbrace{\begin{bmatrix} +\nabla_m H(x_t, m_t) \\ -\nabla_x H(x_t, m_t) \end{bmatrix}}_{\text{Hamiltonian}} - \underbrace{\begin{bmatrix} \nabla \mathcal{K}(\tilde{m}_t^0) - \nabla \mathcal{K}(\tilde{m}_t) \\ \gamma m_t \end{bmatrix}}_{\text{Descent}},$$

where we define  $\tilde{m}_t^0 = (1-\varepsilon\gamma)m_t$  and hence  $\tilde{m}_t - \tilde{m}_t^0 = -\varepsilon\alpha \nabla f(x_t)$ .

Using the monotonicity of subgradient (Lemma 2.1), one can show that the second component in the decomposition above is a descent direction of  $H(x, m)$  in (30):

1) Let  $\hat{\nabla}_x H_t := -\nabla \mathcal{K}(\tilde{m}_t^0) + \nabla \mathcal{K}(\tilde{m}_t)$ , then it is a descent direction of  $H(x, m)$ , because

$$\begin{aligned}\nabla_x H(x_t, m_t)^\top \hat{\nabla}_x H_t &= \alpha \nabla f(x_t)^\top \hat{\nabla}_x H_t \\ &= -\frac{1}{\varepsilon}(\tilde{m}_t^0 - \tilde{m}_t)^\top (\nabla \mathcal{K}(\tilde{m}_t^0) - \nabla \mathcal{K}(\tilde{m}_t)) \leq 0,\end{aligned}$$

where we used the monotonicity of  $\nabla \mathcal{K}(\cdot)$ .

2) If  $m = 0$  is the minimum of  $\mathcal{K}$ , then  $\hat{\nabla}_m H_t := -\gamma m_t$  is a descent direction of  $H(x, m)$  because,

$$\nabla_m H(x_t, m_t)^\top \hat{\nabla}_m H_t = -\gamma \nabla \mathcal{K}((1-\varepsilon\gamma)m_t)^\top m_t \leq \frac{\gamma}{1-\varepsilon\gamma}(\mathcal{K}(0) - \mathcal{K}((1-\varepsilon\gamma)m_t)) \leq 0.$$

Hence, we have

$$\begin{aligned}\frac{d}{dt}H(x_t, m_t) &= \nabla_x H(x_t, m_t)^\top \hat{\nabla}_x H_t + \nabla_m H(x_t, m_t)^\top \hat{\nabla}_m H_t \\ &= -\frac{1}{\varepsilon}(\tilde{m}_t^0 - \tilde{m}_t)^\top (\nabla \mathcal{K}(\tilde{m}_t^0) - \nabla \mathcal{K}(\tilde{m}_t)) - \gamma \nabla \mathcal{K}((1-\varepsilon\gamma)m_t)^\top m_t \leq 0.\end{aligned}$$

Moreover, if  $m = 0$  is the unique minimum of  $\mathcal{K}$ , and  $\varepsilon\gamma < 1$ , then  $\nabla \mathcal{K}((1-\varepsilon\gamma)m_t)^\top m_t = 0$  implies that  $m_t = 0$ , and one can show that the equilibrium points of (29) are stationary points of  $H(x, m)$  using LaSalle's invariance principle.

## B.7 MAIN RESULT OF LION- $\mathcal{K}$ ODE

**Theorem B.3.** *Assume  $\mathcal{K}$  is convex with conjugate  $\mathcal{K}^*$ . Assume  $f, \mathcal{K}, \mathcal{K}^*$  are continuously differentiable. Assume  $(x_t, m_t)$  is the solution of the following ODE:*

$$\begin{aligned}\dot{x}_t &= \nabla \mathcal{K}(\tilde{m}_t) - \lambda x_t, & \text{with} & \quad \tilde{m}_t = m_t - \varepsilon(\gamma m_t + \alpha \nabla f(x_t)), \\ \dot{m}_t &= -\alpha \nabla f(x_t) - \gamma m_t,\end{aligned}$$

where  $\alpha, \gamma, \lambda, \varepsilon > 0$  and  $\varepsilon\gamma \leq 1$ . Let

$$H(x, m) = \alpha f(x) + \frac{\gamma}{\lambda} \mathcal{K}^*(\lambda x) + \frac{1-\varepsilon\gamma}{1+\varepsilon\lambda} (\mathcal{K}^*(\lambda x) + \mathcal{K}(m) - \lambda m^\top x).$$



Then  $H$  yields a Lyapunov function in that

$$-\frac{d}{dt}H(x_t, m_t) = \Delta(x_t, m_t) := \frac{\lambda + \gamma}{1 + \varepsilon\lambda} \Delta_1(x_t, \tilde{m}_t) + \frac{1 - \varepsilon\gamma}{(1 + \varepsilon\lambda)} \Delta_2(m_t, \tilde{m}_t) \geq 0,$$

where

$$\begin{aligned} \Delta_1(x, \tilde{m}) &= (\tilde{m} - \nabla\mathcal{K}^*(\lambda x))^\top (\nabla\mathcal{K}(\tilde{m}) - \lambda x), \\ \Delta_2(m, \tilde{m}) &= \frac{1}{\varepsilon} (\tilde{m} - m)^\top (\nabla\mathcal{K}(\tilde{m}) - \nabla\mathcal{K}(m)). \end{aligned}$$

Moreover, the accumulation points of all trajectories are stationary points of  $F(x) = \alpha f(x) + \frac{\gamma}{\lambda} \mathcal{K}^*(\lambda x)$ .

*Proof.* It is not obvious how to construct the Lyapunov function directly from the ODE. The following proof describes the process of discovering  $H(x, m)$ . We start by examining what inequalities we can write down using the monotonicity of  $\nabla\mathcal{K}$  and  $\nabla\mathcal{K}^*$  via Lemma 2.1, and then work out the Lyapunov function backward.

Write  $\tilde{m} = m - \varepsilon(\gamma m + \alpha \nabla f(x))$ . Because  $\nabla\mathcal{K}$  is a monotonic mapping, we have by Lemma 2.1 the following key inequalities:

$$\begin{aligned} (-\tilde{m} + \nabla\mathcal{K}^*(\lambda x))^\top (\nabla\mathcal{K}(\tilde{m}) - \lambda x) &\leq 0, \\ (m - \tilde{m})^\top (\nabla\mathcal{K}(\tilde{m}) - \nabla\mathcal{K}(m)) &\leq 0, \end{aligned}$$

or equivalently

$$(\varepsilon\alpha \nabla f(x) - (1 - \varepsilon\gamma)m + \nabla\mathcal{K}^*(\lambda x))^\top (\nabla\mathcal{K}(\tilde{m}) - \lambda x) \leq 0 \quad (31)$$

$$\varepsilon(\alpha \nabla f(x) + \gamma m)^\top ((\nabla\mathcal{K}(\tilde{m}) - \lambda x) - (\nabla\mathcal{K}(m) - \lambda x)) \leq 0 \quad (32)$$

Write  $V_x = \nabla\mathcal{K}(\tilde{m}) - \lambda x$ , and  $V_m = -\alpha \nabla f(x) - \gamma m$ . So the ODE is  $\dot{x} = V_x$  and  $\dot{m} = V_m$ . The inequalities can be rewritten into

$$(\varepsilon\alpha \nabla f(x) - (1 - \varepsilon\gamma)m + \nabla\mathcal{K}^*(\lambda x))^\top V_x \leq 0 \quad (33)$$

$$-\varepsilon V_m^\top (V_x - (\nabla\mathcal{K}(m) - \lambda x)) \leq 0 \quad (34)$$

Taking  $\frac{1}{\varepsilon(1+\eta)}$ (Eq. (33) +  $\eta \times$  Eq. (34)) for any  $\eta \geq 0$ , we get

$$\left( \alpha \nabla f(x) - \frac{1 - \varepsilon\gamma(1 + \eta)}{\varepsilon(1 + \eta)} m + \frac{1}{\varepsilon(1 + \eta)} \nabla\mathcal{K}^*(\lambda x) \right)^\top V_x + \frac{\eta\varepsilon}{\varepsilon(1 + \eta)} (\nabla\mathcal{K}(m) - \lambda x)^\top V_m \leq 0$$

Define

$$\tilde{H}(x, m) = \alpha f(x) + \frac{1}{\varepsilon(1 + \eta)\lambda} \mathcal{K}^*(\lambda x) + \frac{1 - \varepsilon\gamma(1 + \eta)}{\varepsilon(1 + \eta)} \frac{1}{\lambda} \mathcal{K}(m) - \frac{1 - \varepsilon\gamma(1 + \eta)}{\varepsilon(1 + \eta)} m^\top x.$$

Then the inequality was reduced to

$$\nabla_x \tilde{H}(x, m)^\top V_x + \frac{\varepsilon\eta\lambda}{1 - \varepsilon\gamma(1 + \eta)} \nabla_m \tilde{H}(x, m)^\top V_m \leq 0.$$

If we take  $\eta$  such that

$$\frac{\varepsilon\eta\lambda}{1 - \varepsilon\gamma(1 + \eta)} = 1, \quad (35)$$

then we have when following  $\dot{x} = V_x$  and  $\dot{m} = V_m$ ,

$$\frac{d}{dt} \tilde{H}(x, m) = \nabla_x \tilde{H}(x, m)^\top V_x + \nabla_m \tilde{H}(x, m)^\top V_m \leq 0.$$

Furthermore, when (35) holds, we have

$$\eta = \frac{1 - \varepsilon\gamma}{\varepsilon(\lambda + \gamma)}, \quad \frac{1}{\varepsilon(1 + \eta)} = \frac{\lambda + \gamma}{1 + \varepsilon\lambda}, \quad \frac{1 - \varepsilon\gamma(1 + \eta)}{\varepsilon(1 + \eta)} = \frac{(1 - \varepsilon\gamma)\lambda}{1 + \varepsilon\lambda}, \quad (36)$$

and hence

$$\begin{aligned}
\tilde{H}(x, m) &= \alpha f(x) + \left( \frac{\lambda + \gamma}{(1 + \epsilon\lambda)\lambda} - \frac{1 - \epsilon\gamma}{1 + \epsilon\lambda} \right) \mathcal{K}^*(\lambda x) + \frac{1 - \epsilon\gamma}{1 + \epsilon\lambda} (\mathcal{K}^*(\lambda x) + \mathcal{K}(m) - \lambda m^\top x) \\
&= \alpha f(x) + \frac{\gamma}{\lambda} \mathcal{K}^*(\lambda x) + \frac{1 - \epsilon\gamma}{1 + \epsilon\lambda} (\mathcal{K}^*(\lambda x) + \mathcal{K}(m) - \lambda m^\top x) \\
&= H(x, m).
\end{aligned}$$

In this case,

$$\begin{aligned}
&\frac{d}{dt} H(x, m) \\
&= \frac{1}{\epsilon(1 + \eta)} (\text{Eq. (33)} + \eta \times \text{Eq. (34)}) \\
&= \frac{\lambda + \gamma}{1 + \epsilon\lambda} \times \text{Eq. (33)} + \frac{1 - \epsilon\gamma}{\epsilon(1 + \epsilon\lambda)} \times \text{Eq. (34)}. \quad // \frac{\eta}{\epsilon(1 + \eta)} = \frac{1 - \epsilon\gamma}{\epsilon(1 + \epsilon\lambda)} \text{ from (36)} \\
&= -\frac{\lambda + \gamma}{1 + \epsilon\lambda} (\tilde{m} - \nabla \mathcal{K}^*(\lambda x))^\top (\nabla \mathcal{K}(\tilde{m}) - \lambda x) - \frac{1 - \epsilon\gamma}{(1 + \epsilon\lambda)\epsilon} (\tilde{m} - m)^\top (\nabla \mathcal{K}(\tilde{m}) - \nabla \mathcal{K}(m)) \leq 0.
\end{aligned}$$

To ensure that  $\eta \geq 0$ , we need  $\epsilon\gamma \leq 1$ .  $\square$

**LaSalle's invariance principle** Let  $H(z)$  is a continuously differentiable Lyapunov function of  $\frac{d}{dt} z_t = v(z_t)$ , satisfying  $\frac{d}{dt} H(z_t) \leq 0$ . By LaSalle's Invariance Principle, the accumulation points of any trajectories of  $\frac{d}{dt} z_t = v(z_t)$  is included in

$$\mathcal{I} = \{ \text{the union of all trajectories } z_t \text{ satisfying } \frac{d}{dt} H(z_t) = 0 \text{ for all } t \geq 0 \}.$$

For the Lion- $\mathcal{K}$  ODE and its  $H$ , the points in  $\mathcal{I}$  should satisfy  $\tilde{m}_t = \nabla \mathcal{K}^*(\lambda x_t)$ , which yields  $\nabla \mathcal{K}(\tilde{m}_t) = \lambda x_t$ , and hence

$$\dot{x}_t = \nabla \mathcal{K}(\tilde{m}_t) - \lambda x_t = 0.$$

This suggests that  $x_t$  is constant for the trajectories in  $\mathcal{I}$ . Because  $\tilde{m}_t = \nabla \mathcal{K}^*(\lambda x_t)$  and  $\tilde{m}_t = m_t - \epsilon(\alpha \nabla f(x_t) + \gamma m_t)$ , we have

$$(1 - \epsilon\gamma)m_t = \nabla \mathcal{K}^*(\lambda x_t) + \epsilon\alpha \nabla f(x_t)$$

Hence,  $(1 - \epsilon\gamma)m_t$  is also constants in the trajectories in  $\mathcal{I}$ . This suggests that  $(1 - \epsilon\gamma)\dot{m}_t = 0$  along the trajectories in  $\mathcal{I}$ , and hence

$$\begin{aligned}
0 &= (1 - \epsilon\gamma)\dot{m}_t \\
&= -(1 - \epsilon\gamma)(\alpha \nabla f(x_t) + \gamma m_t) \\
&= -(1 - \epsilon\gamma)\alpha \nabla f(x_t) - \gamma \nabla \mathcal{K}^*(\lambda x_t) - \epsilon\gamma\alpha \nabla f(x_t) \\
&= -\alpha \nabla f(x_t) - \gamma \nabla \mathcal{K}^*(\lambda x_t) \\
&= -\nabla F(x_t) \quad // F(x) = \alpha f(x) + \frac{\gamma}{\lambda} \mathcal{K}^*(\lambda x)
\end{aligned}$$

Hence, all trajectories in  $\mathcal{I}$  are singleton points and are stationary points of the objective  $F(x) = \alpha f(x) + \frac{\gamma}{\lambda} \mathcal{K}^*(\lambda x)$ .

## B.8 THE DECOMPOSITION STRUCTURE

We provide the decomposition structure (11) which provides a simplified proof of the Lyapunov property.

**Lemma B.4.** For ODE  $\dot{x}_t = V_x(x_t, m_t)$ ,  $\dot{m}_t = V_m(x_t, m_t)$ , let  $H(x, m)$  be a function satisfying

$$\begin{aligned}
\nabla_x H(x, m) &= -\tilde{V}_x(x, m) + \eta V_m(x, m) \\
\nabla_m H(x, m) &= -\hat{V}_m(x, m) - \eta V_x(x, m),
\end{aligned}$$

where  $a \in \mathbb{R}$  and  $\hat{V}_x$  and  $\hat{V}_m$  have positive inner products with  $V_x$ ,  $V_m$ , respectively, that is,

$$\hat{V}_x(x, m)^\top V_x(x, m) \geq 0, \quad \hat{V}_m(x, m)^\top V_m(x, m) \geq 0, \quad \forall x, m.$$

Then we have

$$\frac{d}{dt}H(x_t, m_t) \leq 0.$$

*Proof.*

$$\begin{aligned} \frac{d}{dt}H(x_t, m_t) &= \nabla_x H^\top V_x + \nabla_m H^\top V_m \\ &= (-\hat{V}_x + aV_m)^\top V_x + (-\hat{V}_m - aV_x)^\top V_m \\ &= -(\hat{V}_x^\top V_x + \hat{V}_m^\top V_m) \leq 0. \end{aligned}$$

□

**Lemma B.5.** Under the condition of Theorem 3.1, let

$$V_x(x, m) = \nabla \mathcal{K}(\tilde{m}) - \lambda x$$

$$V_m(x, m) = -\alpha \nabla f(x) - \gamma m = \frac{\tilde{m} - m}{\varepsilon}$$

and related

$$\hat{V}_x(x, m) = \tilde{m} - \nabla \mathcal{K}^*(\lambda x) = -\varepsilon \alpha \nabla f(x) + (1 - \varepsilon \gamma)m - \nabla \mathcal{K}^*(\lambda x),$$

$$\hat{V}_m(x, m) = \nabla \mathcal{K}(\tilde{m}) - \nabla \mathcal{K}(m).$$

Then we have  $\hat{V}_x^\top V_x \geq 0$  and  $\hat{V}_m^\top V_m \geq 0$  by Lemma 2.1. Moreover,

$$\nabla_x H(x, m) = -\eta' \hat{V}_x - \eta V_m$$

$$\nabla_m H(x, m) = -\eta \hat{V}_m + \eta V_x,$$

where  $\eta = \frac{1-\varepsilon\gamma}{1+\varepsilon\lambda}$  and  $\eta' = \frac{\gamma+\lambda}{1+\varepsilon\lambda}$ . This yields

$$\frac{d}{dt}H(x_t, m_t) = \nabla_x H^\top V_x + \nabla_m H^\top V_m = -(\eta' \hat{V}_x^\top V_x + \eta \hat{V}_m^\top V_m) \leq 0.$$

*Proof.* Let  $\eta = \frac{1-\varepsilon\gamma}{1+\varepsilon\lambda}$ . We have We have

$$\begin{aligned} \nabla_m H(x, m) &= \eta(\nabla \mathcal{K}(m) - \lambda x) \\ &= \eta(\nabla \mathcal{K}(\tilde{m}) - \lambda x + \nabla \mathcal{K}(m) - \nabla \mathcal{K}(\tilde{m})) \\ &= \eta(V_x - \hat{V}_m). \end{aligned}$$

$\nabla_x H(x, m)$

$$\begin{aligned} &= \alpha \nabla f(x) + \gamma \nabla \mathcal{K}^*(\lambda x) + \eta(\lambda \nabla \mathcal{K}^*(\lambda x) - \lambda m) \\ &= \alpha \nabla f(x) + (\gamma + \eta \lambda) \nabla \mathcal{K}^*(\lambda x) - \eta \lambda m \\ &= (\gamma + \eta \lambda)(\varepsilon \alpha \nabla f(x) - (1 - \varepsilon \gamma)m + \nabla \mathcal{K}^*(\lambda x)) + (\alpha - (\gamma + \eta \lambda)\varepsilon \alpha) \nabla f(x) - (\eta \lambda - (\gamma + \eta \lambda)(1 - \varepsilon \gamma))m \\ &= \frac{\gamma + \lambda}{1 + \varepsilon \lambda} (\varepsilon \alpha \nabla f(x) - (1 - \varepsilon \gamma)m + \nabla \mathcal{K}^*(\lambda x)) + \eta \alpha \nabla f(x) + \eta \gamma m \\ &= -\frac{\gamma + \lambda}{1 + \varepsilon \lambda} \hat{V}_x - \eta V_m, \end{aligned}$$

where we used the following identities on  $\eta$ :

$$\begin{aligned} (\gamma + \eta \lambda) &= \gamma + \frac{1 - \varepsilon \gamma}{1 + \varepsilon \lambda} \lambda = \frac{\gamma + \lambda}{1 + \varepsilon \lambda} \\ 1 - (\gamma + \eta \lambda)\varepsilon &= 1 - \frac{\gamma + \lambda}{1 + \varepsilon \lambda} \varepsilon = \frac{1 - \varepsilon \gamma}{1 + \varepsilon \lambda} = \eta \\ \eta \lambda - (\gamma + \eta \lambda)(1 - \varepsilon \gamma) &= -\gamma + \frac{\gamma + \lambda}{1 + \varepsilon \lambda} \varepsilon \gamma = \frac{\varepsilon \gamma^2 - \gamma}{1 + \varepsilon \lambda} = -\gamma \eta. \end{aligned}$$

□

## B.9 CONSTRAINT ENFORCING: CONTINUOUS TIME

When  $\mathcal{K}^*$  can possibly take infinite values, the minimization of  $H(x, m)$  becomes a constrained optimization. Let  $\text{dom}\mathcal{K}^* = \{x: \mathcal{K}^*(x) < +\infty\}$ . The optimization can be framed as

$$\min_{x, m} H(x, m) \quad \text{s.t.} \quad \lambda x \in \text{dom}\mathcal{K}^*.$$

The Lion- $\mathcal{K}$  algorithm would first steer  $x_t$  to the region where  $\mathcal{K}^*$  has finite values, and then decrease the finite parts of the objective function. In the following, we show that Lion- $\mathcal{K}$  enforces the constraint with a fast linear rate: the distance from  $\lambda x_t$  and  $\text{dom}\mathcal{K}^*$  decays exponentially fast with time  $t$ , and once  $\lambda x_{t_0} \in \text{dom}\mathcal{K}^*$ , then  $\lambda x_t$  stays within  $\text{dom}\mathcal{K}^*$  for all  $t > t_0$ .

**Theorem B.6.** *Under the condition of Theorem 3.1, we have*

$$\text{dist}(\lambda x_t, \text{dom}\mathcal{K}^*) \leq \exp(\lambda(s-t)) \text{dist}(\lambda x_s, \text{dom}\mathcal{K}^*).$$

*Proof.* Define  $w_{s \rightarrow t} = \exp(\lambda(s-t))$ . Integrating  $\dot{x}_t = \nabla \mathcal{K}(\tilde{m}_t) - \lambda x_t$ , we have

$$\lambda x_t = (1 - w_{s \rightarrow t})z_{s \rightarrow t} + w_{s \rightarrow t}(\lambda x_s), \quad \text{where} \quad z_{s \rightarrow t} = \frac{\int_s^t w_{\tau \rightarrow t} \nabla \mathcal{K}(\tilde{m}_\tau) ds}{\int_s^t w_{\tau \rightarrow t} d\tau}, \quad \forall 0 \leq s \leq t.$$

We have  $\nabla \mathcal{K}(\tilde{m}_\tau) \in \text{dom}\mathcal{K}^*$  from Lemma B.7 and  $\text{dom}\mathcal{K}^*$  is convex. Hence  $z_{s \rightarrow t}$ , as the convex combination of  $\{\nabla \mathcal{K}(\tilde{m}_\tau)\}_\tau$ , belongs to  $\text{dom}\mathcal{K}^*$ . For any  $\epsilon > 0$ , let  $\lambda \hat{x}_s \in \text{dom}\mathcal{K}^*$  to the point satisfying  $\|\lambda \hat{x}_s - \lambda x_s\| \leq \text{dist}(\lambda x_s, \text{dom}\mathcal{K}^*) + \epsilon$ . Hence,

$$\begin{aligned} \text{dist}(\lambda x_t, \text{dom}\mathcal{K}^*) &= \inf_{z \in \text{dom}\mathcal{K}^*} \|\lambda x_t - z\| \\ &\leq \|\lambda x_t - (1 - w_{s \rightarrow t})z_{s \rightarrow t} - w_{s \rightarrow t}\lambda \hat{x}_s\| \\ &= w_{s \rightarrow t} \|\lambda x_s - \lambda \hat{x}_s\| \\ &\leq \exp(\lambda(s-t))(\text{dist}(\lambda x_s, \text{dom}\mathcal{K}^*) + \epsilon). \end{aligned}$$

Taking  $\epsilon \rightarrow 0$  yields

$$\text{dist}(\lambda x_t, \text{dom}\mathcal{K}^*) \leq \exp(\lambda(s-t)) \text{dist}(\lambda x_s, \text{dom}\mathcal{K}^*).$$

□

**Lemma B.7.** *Assume  $\mathcal{K}$  is proper, closed and convex, and  $\mathcal{K}^*$  is the conjugate of  $\mathcal{K}$ . We have*

$$\partial \mathcal{K}(z) \subseteq \text{dom}\mathcal{K}^*, \quad \forall z \in \text{dom}\mathcal{K}.$$

*Proof.* If  $x \in \partial \mathcal{K}(z)$ , then  $z$  attains the minimum of  $\mathcal{K}^*(x) = \sup_z \{x^\top z - \mathcal{K}(z)\}$ , suggesting that  $\mathcal{K}^*(x) = x^\top z - \mathcal{K}(z) < +\infty$ , and hence  $x \in \text{dom}\mathcal{K}^*$ . □

## B.10 DISCRETE TIME ANALYSIS

**Theorem B.8.** *Assume  $f: \mathbb{R}^d \rightarrow \mathbb{R}$  is  $L$ -smooth, and  $\mathcal{K}: \mathbb{R}^d \rightarrow \mathbb{R}$  is closed and convex. Consider the following scheme:*

$$\begin{aligned} m_{t+1} &= \beta_2 m_t - (1 - \beta_2) \nabla f(x_t) \\ \tilde{m}_{t+1} &= \beta_1 m_t - (1 - \beta_1) \nabla f(x_t) \\ x_{t+1} &= x_t + \epsilon (\nabla \mathcal{K}(\tilde{m}_{t+1}) - \lambda x_{t+1}), \end{aligned} \tag{37}$$

where  $\nabla \mathcal{K}$  is a subgradient of  $\mathcal{K}$ , and  $\beta_1, \beta_2 \in (0, 1)$ , and  $\beta_2 > \beta_1$ , and  $\epsilon, \lambda > 0$ . Let  $\mathcal{K}^*$  be the conjugate function of  $\mathcal{K}$ . Define the following Lyapunov function:

$$H(x, m) = f(x) + \frac{1}{\lambda} \mathcal{K}^*(\lambda x) + \frac{\beta_1}{\epsilon \lambda (1 - \beta_1) + (1 - \beta_2)} (\mathcal{K}^*(\lambda x) + \mathcal{K}(m) - \lambda x^\top m),$$

and

$$\begin{aligned} \Delta_t^1 &= (\nabla \mathcal{K}(\tilde{m}_{t+1}) - \lambda x_{t+1})^\top (\tilde{m}_{t+1} - \nabla \mathcal{K}^*(\lambda x_{t+1})), \\ \Delta_t^2 &= (\nabla \mathcal{K}(\tilde{m}_{t+1}) - \nabla \mathcal{K}(m_{t+1}))^\top (\tilde{m}_{t+1} - m_{t+1}), \end{aligned}$$

where  $\nabla\mathcal{K}^*$  is a subgradient of  $\mathcal{K}^*$ . Then we have  $\Delta_t^1 \geq 0$  and  $\Delta_t^2 \geq 0$  from Lemma B.9, and

$$H(x_{t+1}, m_{t+1}) - H(x_t, m_t) \leq -\epsilon(a\Delta_t^1 + b\Delta_t^2) + \frac{L\epsilon^2}{2} \|\nabla\mathcal{K}(\tilde{m}_{t+1}) - \lambda x_{t+1}\|_2^2,$$

where

$$a = \frac{\epsilon\lambda\beta_1}{\epsilon\lambda(1-\beta_1) + (1-\beta_2)} + 1 \geq 0, \quad b = \frac{\beta_1(1-\beta_2)}{(\beta_2-\beta_1)(\epsilon\lambda(1-\beta_1) + (1-\beta_2))} \geq 0.$$

Hence, a telescoping sum yields

$$\frac{1}{T} \sum_{t=0}^{T-1} a\Delta_t^1 + b\Delta_t^2 \leq \frac{H(x_0, m_0) - H(x_T, m_T)}{\epsilon T} + \frac{L\epsilon}{2} B_t,$$

where  $B_t = \frac{1}{T} \sum_{t=1}^T \|\nabla\mathcal{K}(\tilde{m}_{t+1}) - \lambda x_{t+1}\|_2^2$ .

Note that we used an implicit scheme in the update of  $x_t$  in (43). It is equivalent the explicit scheme with an adjusted learning rate:

$$x_{t+1} = x_t + \frac{\epsilon}{1 + \epsilon\lambda} (\nabla\mathcal{K}(\tilde{m}_{t+1}) - \lambda x_t).$$

*Proof.* We follow the proof in the continuous-time case to find out a Lyapunov function for the discrete time update in (43). We start with constructing the basic inequalities and work out the Lyapunov function backwardly. From Lemma 2.1, we have

$$(\nabla\mathcal{K}(\tilde{m}_{t+1}) - \lambda x_{t+1})^\top (\nabla\mathcal{K}^*(\lambda x_{t+1}) - \tilde{m}_{t+1}) \leq 0. \quad (38)$$

$$(\nabla\mathcal{K}(\tilde{m}_{t+1}) - \nabla\mathcal{K}(m_{t+1}))^\top (m_{t+1} - \tilde{m}_{t+1}) \leq 0. \quad (39)$$

Taking  $a \times Eq.(38) + b \times Eq.(39)$  for  $a, b \geq 0$ , we have

$$\begin{aligned} & (\nabla\mathcal{K}(\tilde{m}_{t+1}) - \lambda x_{t+1})^\top (a(\nabla\mathcal{K}^*(\lambda x_{t+1}) - \tilde{m}_{t+1}) + b(m_{t+1} - \tilde{m}_{t+1})) + \dots \\ & \quad + b(\nabla\mathcal{K}(m_{t+1}) - \lambda x_{t+1})^\top (-m_{t+1} + \tilde{m}_{t+1}) \leq 0. \end{aligned}$$

Plugging (43) yields

$$\begin{aligned} & (\nabla\mathcal{K}(\tilde{m}_{t+1}) - \lambda x_{t+1})^\top (a\nabla\mathcal{K}^*(\lambda x_{t+1}) - ((a+b)\beta_1 - b\beta_2)m_t + (a - (a+b)\beta_1 + b\beta_2)\nabla f(x_t)) \\ & \quad - b(\beta_2 - \beta_1)(\nabla\mathcal{K}(m_{t+1}) - \lambda x_{t+1})^\top (m_t + \nabla f(x_t)) \leq 0 \end{aligned}$$

Define

$$H(x, m) = (a-c)f(x) + \frac{a}{\lambda}\mathcal{K}^*(\lambda x) + \frac{c}{\lambda}\mathcal{K}(m) - cx^\top m, \quad \text{with } c = (a+b)\beta_1 - b\beta_2,$$

and

$$\hat{\nabla}_x H_t = (a-c)\nabla f(x_t) + a\nabla\mathcal{K}^*(\lambda x_{t+1}) - cm_t, \quad \hat{\nabla}_m H_t = \frac{c}{\lambda}\nabla\mathcal{K}(m_{t+1}) - cx_{t+1}.$$

Then the inequality can be written into

$$\hat{\nabla}_x H_t^\top (\nabla\mathcal{K}(\tilde{m}_{t+1}) - \lambda x_{t+1}) + \hat{\nabla}_m H_t^\top \left( \frac{b(\beta_2 - \beta_1)\lambda}{c} (-m_t - \nabla f(x_t)) \right) \leq 0.$$

Plugging the update rule of  $x_{t+1} = x_t + \epsilon(\nabla\mathcal{K}(\tilde{m}_{t+1}) - \lambda x_{t+1})$  and  $m_{t+1} - m_t = -(1-\beta_2)(m_t + \nabla f(x_t))$ , we get

$$\hat{\nabla}_x H_t^\top \left( \frac{x_{t+1} - x_t}{\epsilon} \right) + \hat{\nabla}_m H_t^\top \left( \frac{b(\beta_2 - \beta_1)\lambda}{c(1-\beta_2)} (m_{t+1} - m_t) \right) \leq 0.$$

To make this coincide with the linear approximation of the difference  $H(x_{t+1}, m_{t+1}) - H(x_t, m_t)$  (see Lemma B.9), we want

$$\frac{b(\beta_2 - \beta_1)\lambda}{c(1-\beta_2)} = \frac{1}{\epsilon}.$$

On the other hand, to make the coefficient of  $f(x)$  in  $H(x, m)$  equal to one, we want  $a - c = 1$ . This yields the following equations on  $a, b, c$ :

$$c = (a + b)\beta_1 - b\beta_2, \quad \frac{b(\beta_2 - \beta_1)\lambda}{c(1 - \beta_2)} = \frac{1}{\epsilon}, \quad a - c = 1, \quad a, b \geq 0.$$

To solve this, let  $c = z\epsilon(\beta_2 - \beta_1)\lambda$  and  $b = z(1 - \beta_2)$  for some  $z \geq 0$  and plug them together with  $a = c + 1$  into the first equations:

$$z\epsilon(\beta_2 - \beta_1)\lambda = (z\epsilon(\beta_2 - \beta_1)\lambda + 1 + z(1 - \beta_2))\beta_1 - z(1 - \beta_2)\beta_2.$$

We get

$$\begin{aligned} z &= \frac{\beta_1}{\epsilon(\beta_2 - \beta_1)\lambda - \epsilon(\beta_2 - \beta_1)\lambda\beta_1 - (1 - \beta_2)\beta_1 + (1 - \beta_2)\beta_2} \\ &= \frac{\beta_1}{\epsilon\lambda(\beta_2 - \beta_1)(1 - \beta_1) + (1 - \beta_2)(\beta_2 - \beta_1)} \\ &= \frac{\beta_1}{(\beta_2 - \beta_1)(\epsilon\lambda(1 - \beta_1) + (1 - \beta_2))} \geq 0. \end{aligned}$$

Hence

$$b = \frac{\beta_1(1 - \beta_2)}{(\beta_2 - \beta_1)(\epsilon\lambda(1 - \beta_1) + (1 - \beta_2))} \geq 0, \quad c = \frac{\epsilon\lambda\beta_1}{\epsilon\lambda(1 - \beta_1) + (1 - \beta_2)} \geq 0, \quad a = c + 1 \geq 0.$$

In this case, we have

$$\begin{aligned} H(x, m) &= f(x) + \frac{1}{\lambda}\mathcal{K}^*(\lambda x) + c(\mathcal{K}^*(\lambda x) + \mathcal{K}(m) - \lambda x^\top m) \\ &= f(x) + \frac{1}{\lambda}\mathcal{K}^*(\lambda x) + \frac{\epsilon\lambda\beta_1}{\epsilon\lambda(1 - \beta_1) + (1 - \beta_2)}(\mathcal{K}^*(\lambda x) + \mathcal{K}(m) - \lambda x^\top m), \end{aligned}$$

and

$$\hat{\nabla}_x H_t^\top \left( \frac{x_{t+1} - x_t}{\epsilon} \right) + \hat{\nabla}_m H_t^\top \left( \frac{m_{t+1} - m_t}{\epsilon} \right) = -a\Delta_t^1 - b\Delta_t^2 \leq 0.$$

From Lemma B.9, we get

$$H(x_{t+1}, m_{t+1}) - H(x_t, m_t) \leq -\epsilon(a\Delta_t^1 + b\Delta_t^2) + \frac{L}{2} \|x_{t+1} - x_t\|_2^2.$$

□

**Lemma B.9.** Let  $H(x, m) = f(x) + \mathcal{K}_1(x) + \mathcal{K}_2(m) - \lambda x m$ , where  $f$  is  $L$ -smooth, and  $\mathcal{K}_1, \mathcal{K}_2$  are convex functions with subgradient  $\nabla \mathcal{K}_1$  and  $\nabla \mathcal{K}_2$ . Then

$$H(x_{t+1}, m_{t+1}) - H(x_t, m_t) \leq \hat{\nabla}_x H_t^\top (x_{t+1} - x_t) + \hat{\nabla}_m H_t^\top (m_{t+1} - m_t) + \frac{L}{2} \|x_{t+1} - x_t\|_2^2,$$

where

$$\begin{aligned} \hat{\nabla}_x H_t &= \nabla f(x_t) + \mathcal{K}_1(x_{t+1}) - \lambda m_t \\ \hat{\nabla}_m H_t &= \mathcal{K}_2(m_{t+1}) - \lambda x_{t+1}. \end{aligned}$$

Note the use of  $x_t$  vs.  $x_{t+1}$  and  $m_t$  vs.  $m_{t+1}$  in  $\hat{\nabla}_x H_t$  and  $\hat{\nabla}_m H_t$ .

*Proof.* We have

$$\begin{aligned} f(x_{t+1}) - f(x_t) &\leq \nabla f(x_t)^\top (x_{t+1} - x_t) + \frac{L}{2} \|x_{t+1} - x_t\|_2^2 \\ \mathcal{K}_1(x_{t+1}) - \mathcal{K}_1(x_t) &\leq \nabla \mathcal{K}_1(x_{t+1})^\top (x_{t+1} - x_t) \\ \mathcal{K}_2(m_{t+1}) - \mathcal{K}_2(m_t) &\leq \nabla \mathcal{K}_2(m_{t+1})^\top (m_{t+1} - m_t) \\ x_{t+1}^\top m_{t+1} - x_t^\top m_t &= m_t^\top (x_{t+1} - x_t) + x_{t+1}^\top (m_{t+1} - m_t). \end{aligned}$$

Summing them together yields the result. □

**Theorem B.10.** *Under the same conditions of Theorem 4.1, for any two integers  $s \leq t$ ,*

$$\text{dist}(\lambda x_t, \text{dom}\mathcal{K}^*) \leq \left( \frac{1}{1 + \epsilon\lambda} \right)^{s-t} \text{dist}(\lambda x_s, \text{dom}\mathcal{K}^*), \quad \forall s \leq t.$$

*Proof.* Rewriting the update into the explicit form:

$$x_{t+1} = \frac{1}{1 + \epsilon\lambda} x_t + \frac{\epsilon}{1 + \epsilon\lambda} \nabla \mathcal{K}(\tilde{m}_{t+1}).$$

Unrolling this update yields, with  $w_{s \rightarrow t} = \left( \frac{1}{1 + \epsilon\lambda} \right)^{s-t}$ ,

$$\lambda x_t = (1 - w_{s \rightarrow t}) z_{s \rightarrow t} + w_{s \rightarrow t} \lambda x_s, \quad z_{s \rightarrow t} = \frac{\sum_{k=s+1}^t w_{k \rightarrow t} \nabla \mathcal{K}(\tilde{m}_k)}{\sum_{k=s+1}^t w_{k \rightarrow t}}.$$

We have  $\nabla \mathcal{K}(\tilde{m}_k) \in \text{dom}\mathcal{K}^*$  from Lemma B.7 and  $\text{dom}\mathcal{K}^*$  is convex. Hence  $z_{s \rightarrow t}$ , as the convex combination of  $\{\nabla \mathcal{K}(\tilde{m}_k)\}_k$ , belongs to  $\text{dom}\mathcal{K}^*$ . For any  $\epsilon > 0$ , let  $\lambda \hat{x}_s \in \text{dom}\mathcal{K}^*$  to the point satisfying  $\|\lambda \hat{x}_s - \lambda x_s\| \leq \text{dist}(\lambda x_s, \text{dom}\mathcal{K}^*) + \epsilon$ . Hence,

$$\begin{aligned} \text{dist}(\lambda x_t, \text{dom}\mathcal{K}^*) &= \inf_{z \in \text{dom}\mathcal{K}^*} \|\lambda x_t - z\| \\ &\leq \|\lambda x_t - (1 - w_{s \rightarrow t}) z_{s \rightarrow t} + w_{s \rightarrow t} \lambda \hat{x}_s\| \\ &= w_{s \rightarrow t} \|\lambda x_s - \lambda \hat{x}_s\| \\ &\leq \left( \frac{1}{1 + \epsilon\lambda} \right)^{s-t} (\text{dist}(\lambda x_s, \text{dom}\mathcal{K}^*) + \epsilon). \end{aligned}$$

Taking  $\epsilon \rightarrow 0$  yields the result. □

## B.11 ANALYSIS WITH STOCHASTIC GRADIENT FOR LION- $\mathcal{K}$

In this section, we are going to have the convergence analysis of discrete time Lion- $\mathcal{K}$ . The proof idea is adapted for section B.10, by defining the same Hamiltonian function, we obtain the bound for  $\Delta_t^1$  and  $\Delta_t^2$ .

Compared with the deterministic case, the main challenge is to bound an additional correlation term due to the stochastic gradient at each iteration  $t$ :

$$V_t := \text{cov}(g_t, \nabla \mathcal{K}(\tilde{m}_{t+1})) = \text{cov}(g_t, \nabla \mathcal{K}(\beta_1 m_t + (1 - \beta_1) g_t)), \quad (40)$$

where  $\text{cov}(X, Y) = \mathbb{E}[(X - \mathbb{E}[X])^\top (Y - \mathbb{E}[Y])]$ .

**Definition B.11.** *For a random variable  $X$  on  $\mathbb{R}^d$ , its (trace of) variance  $\text{var}(X)$ , when exists, is defined as*

$$\text{var}(X) = \mathbb{E}[\|X - \mathbb{E}[X]\|_2^2]$$

**Assumption B.12.** *Assume*

$$\text{var}(g_t) \leq \frac{v_{\max}}{n_{\text{batch}}},$$

where  $n_{\text{batch}}$  represents the batch size.

**Assumption B.13.**  *$\mathcal{D}$  is the data distribution, the stochastic sample  $\xi_t \sim \mathcal{D}$  is i.i.d., given a function  $f(x; \xi)$ , the gradient  $\nabla f(x; \xi)$  is taken with respect to variable  $x$ , and  $\mathbb{E}[\nabla f(x, \xi)] = \nabla f(x)$*

**Theorem B.14.** *Under the assumptions delineated in B.13 and B.12, consider a function  $f: \mathbb{R}^d \rightarrow \mathbb{R}$  that is  $L$ -smooth. Additionally, let  $\mathcal{K}: \mathbb{R}^d \rightarrow \mathbb{R}$  be a closed and convex function, consider the following scheme:*

$$\begin{aligned} m_{t+1} &= \beta_2 m_t - (1 - \beta_2) g_t \\ \tilde{m}_{t+1} &= \beta_1 m_t - (1 - \beta_1) g_t \\ x_{t+1} &= x_t + \epsilon (\nabla \mathcal{K}(\tilde{m}_{t+1}) - \lambda x_{t+1}), \end{aligned} \quad (41)$$

where  $g_t = \nabla f(x_t; \xi_t)$  as shown in [B.13](#),  $m_0, g_1, \dots, g_t, \dots$  are random variables with  $\mathbb{E}[g_t] = \nabla f(x_t)$ .  $\nabla \mathcal{K}$  is a weak gradient of  $\mathcal{K}$  with  $\nabla \mathcal{K}(0) = 0$ ,  $\|\nabla \mathcal{K}(x) - \nabla \mathcal{K}(y)\| \leq L_{\mathcal{K}} \|x - y\|$ ,  $\forall x, y \in \mathbb{R}^d$ , and  $\beta_1, \beta_2 \in (0, 1)$ , and  $\beta_2 > \beta_1$ , and  $\epsilon, \lambda > 0$ .

Let  $\mathcal{K}^*$  be the conjugate function of  $\mathcal{K}$ . Define the following Lyapunov function:

$$H(x, m) = f(x) + \frac{1}{\lambda} \mathcal{K}^*(\lambda x) + \frac{\beta_1}{\epsilon \lambda (1 - \beta_1) + (1 - \beta_2)} (\mathcal{K}^*(\lambda x) + \mathcal{K}(m) - \lambda x^\top m),$$

and

$$\begin{aligned} \Delta_t^1 &= (\nabla \mathcal{K}(\tilde{m}_{t+1}) - \lambda x_{t+1})^\top (\tilde{m}_{t+1} - \nabla \mathcal{K}^*(\lambda x_{t+1})), \\ \Delta_t^2 &= (\nabla \mathcal{K}(\tilde{m}_{t+1}) - \nabla \mathcal{K}(m_{t+1}))^\top (\tilde{m}_{t+1} - m_{t+1}), \end{aligned}$$

where  $\nabla \mathcal{K}^*$  is a subgradient of  $\mathcal{K}^*$ . Then we have  $\Delta_t^1 \geq 0$  and  $\Delta_t^2 \geq 0$  from [Lemma B.9](#), and

$$\begin{aligned} \mathbb{E}[H(x_{t+1}, m_{t+1}) - H(x_t, m_t)] &\leq \mathbb{E} \left[ -\epsilon (a \Delta_t^1 + b \Delta_t^2) + \frac{L\epsilon^2}{2} \|\nabla \mathcal{K}(\tilde{m}_{t+1}) - \lambda x_{t+1}\|_2^2 \right] \\ &\quad + \epsilon \frac{L_{\mathcal{K}}}{1 + \lambda\epsilon} (1 - \beta_1) \frac{v_{\max}}{n_{\text{batch}}} + \frac{L_{\mathcal{K}}}{1 + \lambda\epsilon} \sqrt{\frac{(1 - \beta_2)}{(1 + \beta_2)}} \frac{v_{\max}}{n_{\text{batch}}} \end{aligned}$$

where

$$a = \frac{\epsilon \lambda \beta_1}{\epsilon \lambda (1 - \beta_1) + (1 - \beta_2)} + 1 \geq 0, \quad b = \frac{\beta_1 (1 - \beta_2)}{(\beta_2 - \beta_1)(\epsilon \lambda (1 - \beta_1) + (1 - \beta_2))} \geq 0.$$

$v_{\max}, n_{\text{batch}}$  are defined in [B.12](#)

Hence, a telescoping sum yields

$$\frac{1}{T} \sum_{t=0}^{T-1} \mathbb{E} [a \Delta_t^1 + b \Delta_t^2] \leq \mathbb{E} \left[ \frac{H(x_0, m_0) - H(x_T, m_T)}{\epsilon T} + \frac{L\epsilon}{2} B_T + \frac{C_T}{n_{\text{batch}}} \right],$$

where  $B_t = \frac{1}{T} \sum_{t=1}^T \|\nabla \mathcal{K}(\tilde{m}_{t+1}) - \lambda x_{t+1}\|_2^2$ , and  $C_t = \left( \frac{L_{\mathcal{K}}}{1 + \lambda\epsilon} (1 - \beta_1) + \frac{L_{\mathcal{K}}}{1 + \lambda\epsilon} \sqrt{\frac{(1 - \beta_2)}{(1 + \beta_2)}} \right) v_{\max}$ .

*Proof.* The proof is a simple extended variant of [4.1](#). Following the proof of [Theorem B.8](#), define

$$H(x, m) = (a - c)f(x) + \frac{a}{\lambda} \mathcal{K}^*(\lambda x) + \frac{c}{\lambda} \mathcal{K}(m) - cx^\top m, \quad \text{with } c = (a + b)\beta_1 - b\beta_2,$$

where

$$a = \frac{\epsilon \lambda \beta_1}{\epsilon \lambda (1 - \beta_1) + (1 - \beta_2)} + 1 \geq 0, \quad b = \frac{\beta_1 (1 - \beta_2)}{(\beta_2 - \beta_1)(\epsilon \lambda (1 - \beta_1) + (1 - \beta_2))} \geq 0, \quad c = a - 1.$$

By the definition of  $\Delta_t^1, \Delta_t^2$ , we have

$$\begin{aligned} &a \Delta_t^1 + b \Delta_t^2 \\ &= a (\nabla \mathcal{K}(\tilde{m}_{t+1}) - \lambda x_{t+1})^\top (\tilde{m}_{t+1} - \nabla \mathcal{K}^*(\lambda x_{t+1})) \\ &\quad + b (\nabla \mathcal{K}(\tilde{m}_{t+1}) - \nabla \mathcal{K}(m_{t+1}))^\top (\tilde{m}_{t+1} - m_{t+1}) \\ &= (\nabla \mathcal{K}(\tilde{m}_{t+1}) - \lambda x_{t+1})^\top (a (\nabla \mathcal{K}^*(\lambda x_{t+1}) - \tilde{m}_{t+1}) + b (\tilde{m}_{t+1} - m_{t+1})) \\ &\quad + b (\nabla \mathcal{K}(m_{t+1}) - \lambda x_{t+1})^\top (m_{t+1} - \tilde{m}_{t+1}) \\ &= -(\nabla \mathcal{K}(\tilde{m}_{t+1}) - \lambda x_{t+1})^\top (a \nabla \mathcal{K}^*(\lambda x_{t+1}) - ((a + b)\beta_1 - b\beta_2)m_t + (a - (a + b)\beta_1 + b\beta_2)\nabla f(x_t)) \\ &\quad - b \frac{\beta_2 - \beta_1}{1 - \beta_2} \frac{\lambda}{c} \left( \frac{c}{\lambda} \nabla \mathcal{K}(m_{t+1}) - cx_{t+1} \right)^\top (m_{t+1} - m_t) \\ &= -[(a - c)g_t + a \nabla \mathcal{K}^*(\lambda x_{t+1}) - cm_t]^\top (\nabla \mathcal{K}(\tilde{m}_{t+1}) - \lambda x_{t+1}) \\ &\quad - \frac{1}{\epsilon} \left[ \frac{c}{\lambda} \nabla \mathcal{K}(m_{t+1}) - cx_{t+1} \right]^\top (m_{t+1} - m_t) \\ &= -\frac{1}{\epsilon} [(a - c)g_t + a \nabla \mathcal{K}^*(\lambda x_{t+1}) - cm_t]^\top (x_{t+1} - x_t) \\ &\quad - \frac{1}{\epsilon} \left[ \frac{c}{\lambda} \nabla \mathcal{K}(m_{t+1}) - cx_{t+1} \right]^\top (m_{t+1} - m_t) \end{aligned} \tag{42}$$



By Lemma B.9,

$$H(x_{t+1}, m_{t+1}) - H(x_t, m_t) \leq \hat{\nabla}_x H_t^\top (x_{t+1} - x_t) + \hat{\nabla}_m H_t^\top (m_{t+1} - m_t) + \frac{L}{2} \|x_{t+1} - x_t\|_2^2,$$

where

$$\begin{aligned} \hat{\nabla}_x H_t &= (a - c)\nabla f(x_t) + a\nabla\mathcal{K}^*(\lambda x_{t+1}) - cm_t, \\ \hat{\nabla}_m H_t &= \frac{c}{\lambda}\nabla\mathcal{K}(m_{t+1}) - cx_{t+1} = \frac{c}{\epsilon\lambda}(\hat{V}_{x,t} - \nabla\mathcal{K}(\tilde{m}_{t+1}) + \nabla\mathcal{K}(m_{t+1})) \end{aligned}$$

with

$$\begin{aligned} V_{x,t} &= x_{t+1} - x_t = \epsilon(\nabla\mathcal{K}(\tilde{m}_{t+1}) - \lambda x_{t+1}) \\ V_{m,t} &= m_{t+1} - m_t = -(1 - \beta_2)(g_t - m_t) \\ \tilde{m}_{t+1} - m_{t+1} &= -(\beta_2 - \beta_1)(g_t - m_t) = -(\beta_2 - \beta_1)V_{m,t} \\ \hat{V}_{m,t} &= -\nabla\mathcal{K}(\tilde{m}_{t+1}) + \nabla\mathcal{K}(m_{t+1}) \end{aligned}$$

This gives

$$\begin{aligned} &H(x_{t+1}, m_{t+1}) - H(x_t, m_t) \\ &\leq \hat{\nabla}_x H_t^\top (x_{t+1} - x_t) + \hat{\nabla}_m H_t^\top (m_{t+1} - m_t) + \frac{L}{2} \|x_{t+1} - x_t\|_2^2 \end{aligned}$$

Hence,

$$\begin{aligned} H(x_{t+1}, m_{t+1}) - H(x_t, m_t) &\leq [(a - c)\nabla f(x_t) + a\nabla\mathcal{K}^*(\lambda x_{t+1}) - cm_t]^\top (x_{t+1} - x_t) \\ &\quad + \left[ \frac{c}{\lambda}\nabla\mathcal{K}(m_{t+1}) - cx_{t+1} \right]^\top (m_{t+1} - m_t) + \frac{L}{2} \|x_{t+1} - x_t\|_2^2 \\ &= [(a - c)g_t + a\nabla\mathcal{K}^*(\lambda x_{t+1}) - cm_t]^\top (x_{t+1} - x_t) \\ &\quad + \left[ \frac{c}{\lambda}\nabla\mathcal{K}(m_{t+1}) - cx_{t+1} \right]^\top (m_{t+1} - m_t) + \frac{L}{2} \|x_{t+1} - x_t\|_2^2 \\ &\quad + \epsilon(a - c)(\nabla f(x_t) - g_t)^\top (\nabla\mathcal{K}(\tilde{m}_{t+1}) - \lambda x_{t+1}) \\ &= -\epsilon(a\Delta_t^1 + b\Delta_t^2) + \frac{L}{2} \|x_{t+1} - x_t\|_2^2 \quad // \text{by equation 44} \\ &\quad + \epsilon(a - c)(\nabla f(x_t) - g_t)^\top (\nabla\mathcal{K}(\tilde{m}_{t+1}) - \lambda x_{t+1}) \end{aligned}$$

It suffices to bound  $\mathbb{E} [(\nabla f(x_t) - g_t)^\top (\nabla\mathcal{K}(\tilde{m}_{t+1}) - \lambda x_{t+1})]$ .

Note that

$$\begin{aligned} &\mathbb{E} [(\nabla f(x_t) - g_t)^\top (\nabla\mathcal{K}(\tilde{m}_{t+1}) - \lambda x_{t+1})] \\ &= \mathbb{E} \left[ (\nabla f(x_t) - g_t)^\top \left( \frac{1}{1 + \lambda\epsilon}\nabla\mathcal{K}(\tilde{m}_{t+1}) - \frac{\lambda}{1 + \lambda\epsilon}x_t \right) \right] \\ &= \frac{1}{1 + \lambda\epsilon}\mathbb{E} [(\nabla f(x_t) - g_t)^\top \nabla\mathcal{K}(\tilde{m}_{t+1})] + \frac{\lambda}{1 + \lambda\epsilon}\mathbb{E} [(\nabla f(x_t) - g_t)^\top x_t] \end{aligned}$$

By Assumption B.13,

$$\begin{aligned} \mathbb{E} [(\nabla f(x_t) - g_t)^\top \lambda x_t] &= \lambda \mathbb{E}_{x_t} [\mathbb{E}_{\xi_t} [(\nabla f(x_t) - \nabla f(x_t, \xi_t))^\top x_t | x_t]] \\ &= 0 \quad // \text{by B.13 } \mathbb{E}[\nabla f(x, \xi)] = \nabla f(x) \end{aligned}$$

Next, let us bound  $\mathbb{E} [(\nabla f(x_t) - g_t)^\top \nabla\mathcal{K}(\tilde{m}_{t+1})]$ .

$$\begin{aligned} \mathbb{E} [(\nabla f(x_t) - g_t)^\top \nabla\mathcal{K}(\tilde{m}_{t+1})] &= \mathbb{E} [(\nabla f(x_t) - g_t)^\top \nabla\mathcal{K}(\beta_1 m_t - (1 - \beta_1)g_t)] \\ &\leq L_{\mathcal{K}}(1 - \beta_1)\text{var}(g_t) + L_{\mathcal{K}}\sqrt{\text{var}(\beta_1 m_t) \cdot \text{var}(g_t)} \quad // \text{by B.18} \\ &\leq L_{\mathcal{K}}(1 - \beta_1)\frac{v_{max}}{n_{batch}} + L_{\mathcal{K}}\sqrt{\frac{(1 - \beta_2)}{(1 + \beta_2)}\frac{v_{max}}{n_{batch}}} \quad // \text{by B.18} \end{aligned}$$

Hence,

$$\begin{aligned}
& \mathbb{E} [(\nabla f(x_t) - g_t)^\top (\nabla \mathcal{K}(\tilde{m}_{t+1}) - \lambda x_{t+1})] \\
&= \frac{1}{1 + \lambda \epsilon} \mathbb{E} [(\nabla f(x_t) - g_t)^\top \nabla \mathcal{K}(\tilde{m}_{t+1})] + \frac{\lambda}{1 + \lambda \epsilon} \mathbb{E} [(\nabla f(x_t) - g_t)^\top x_{t+1}] \\
&\leq \frac{L_{\mathcal{K}}}{1 + \lambda \epsilon} (1 - \beta_1) \frac{v_{max}}{n_{batch}} + \frac{L_{\mathcal{K}}}{1 + \lambda \epsilon} \sqrt{\frac{(1 - \beta_2)}{(1 + \beta_2)}} \frac{v_{max}}{n_{batch}}
\end{aligned}$$

□

**Lemma B.15.** *Let  $X, Y$  be two  $\mathbb{R}^d$ -valued random variables with  $\text{var}(X) < +\infty$  and  $\text{var}(Y) < +\infty$ , and assume  $\mathcal{K}$  yields a weak derivative  $\nabla \mathcal{K}$ . We have*

$$\mathbb{E}[(Y - \mathbb{E}Y)^\top \nabla \mathcal{K}(X + \epsilon Y)] \leq L_{\mathcal{K}} \epsilon \text{var}(Y) + L_{\mathcal{K}} \text{var}(X) \cdot \text{var}(Y)$$

*Proof.*

$$\begin{aligned}
& \mathbb{E}[(Y - \mathbb{E}Y)^\top \nabla \mathcal{K}(X + \epsilon Y)] \\
&= \mathbb{E}[(Y - \mathbb{E}Y)^\top (\nabla \mathcal{K}(X + \epsilon Y) - \nabla \mathcal{K}(\mathbb{E}X + \epsilon \mathbb{E}Y))] \\
&= \sqrt{\mathbb{E} \|Y - \mathbb{E}Y\|^2} \sqrt{\mathbb{E} \|\nabla \mathcal{K}(X + \epsilon Y) - \nabla \mathcal{K}(\mathbb{E}X + \epsilon \mathbb{E}Y)\|^2} \\
&= \sqrt{\mathbb{E} \|Y - \mathbb{E}Y\|^2} \sqrt{L_{\mathcal{K}} \mathbb{E} \|X + \epsilon Y - \mathbb{E}X - \epsilon \mathbb{E}Y\|^2} \\
&= L_{\mathcal{K}} \sqrt{\mathbb{E} \|Y - \mathbb{E}Y\|^2} \left( \sqrt{\mathbb{E} \|X - \mathbb{E}X\|^2} + \sqrt{\epsilon^2 \mathbb{E} \|Y - \mathbb{E}Y\|^2} \right) \\
&= L_{\mathcal{K}} \epsilon \mathbb{E} \|Y - \mathbb{E}Y\|^2 + L_{\mathcal{K}} \sqrt{\mathbb{E} \|Y - \mathbb{E}Y\|^2} \sqrt{\mathbb{E} \|X - \mathbb{E}X\|^2} \\
&= L_{\mathcal{K}} \epsilon \text{var}(Y) + L_{\mathcal{K}} \sqrt{\text{var}(X) \cdot \text{var}(Y)}
\end{aligned}$$

□

**Lemma B.16** (Cumulative error of stochastic gradient [4]). *Following the same setting in theorem B.14, denote  $\delta_l = g_l - \nabla f(x_l)$ , for any  $k < \infty$  and fixed weight  $-\infty < \alpha_1, \dots, \alpha_k < \infty$ ,  $\sum_{l=1}^k \delta_l$  is a Martingale. In particular,*

$$\mathbb{E} \left[ \left[ \sum_{l=1}^k \alpha_l \delta_l \right]^2 \right] \leq \sum_{l=1}^k \alpha_l^2 \sigma^2.$$

*Proof.* We simply check the definition of a Martingale. Denote  $Y_k := \sum_{l=1}^k \alpha_l \delta_l$ . First, we have that

$$\begin{aligned}
\mathbb{E}[|Y_k|] &= \mathbb{E} \left[ \left| \sum_{l=1}^k \alpha_l \delta_l \right| \right] \\
&\leq \sum_l |\alpha_l| \mathbb{E}[|\delta_l|] && \text{triangle inequality} \\
&= \sum_l |\alpha_l| \mathbb{E}[\mathbb{E}[|\delta_l| | x_l]] && \text{law of total probability} \\
&\leq \sum_l |\alpha_l| \mathbb{E}[\sqrt{\mathbb{E}[\delta_l^2 | x_l]}] && \text{Jensen's inequality} \\
&\leq \sum_l |\alpha_l| \sigma < \infty
\end{aligned}$$

Second, again using the law of total probability,

$$\begin{aligned}
\mathbb{E}[Y_{k+1}|Y_1, \dots, Y_k] &= \mathbb{E}\left[\sum_{l=1}^{k+1} \alpha_l \delta_l \mid \alpha_1 \delta_1, \dots, \alpha_k \delta_k\right] \\
&= Y_k + \alpha_{k+1} \mathbb{E}[\delta_{k+1} \mid \alpha_1 \delta_1, \dots, \alpha_k \delta_k] \\
&= Y_k + \alpha_{k+1} \mathbb{E}[\mathbb{E}[\delta_{k+1} | x_{k+1}, \alpha_1 \delta_1, \dots, \alpha_k \delta_k] \mid \alpha_1 \delta_1, \dots, \alpha_k \delta_k] \\
&= Y_k + \alpha_{k+1} \mathbb{E}[\mathbb{E}[\delta_{k+1} | x_{k+1}] \mid \alpha_1 \delta_1, \dots, \alpha_k \delta_k] \\
&= Y_k
\end{aligned}$$

This completes the proof that it is indeed a Martingale. We now make use of the properties of Martingale difference sequences to establish a variance bound on the Martingale.

$$\begin{aligned}
\mathbb{E}\left[\left(\sum_{l=1}^k \alpha_l \delta_l\right)^2\right] &= \sum_{l=1}^k \mathbb{E}[\alpha_l^2 \delta_l^2] + 2 \sum_{l < j} \mathbb{E}[\alpha_l \alpha_j \delta_l \delta_j] \\
&= \sum_{l=1}^k \alpha_l^2 \mathbb{E}[\mathbb{E}[\delta_l^2 \mid \delta_1, \dots, \delta_{l-1}]] + 2 \sum_{l < j} \alpha_l \alpha_j \mathbb{E}\left[\delta_l \mathbb{E}[\mathbb{E}[\delta_j \mid \delta_1, \dots, \delta_{j-1}] \mid \delta_l]\right] \\
&= \sum_{l=1}^k \alpha_l^2 \mathbb{E}[\mathbb{E}[\mathbb{E}[\delta_l^2 \mid x_l, \delta_1, \dots, \delta_{l-1}] \mid \delta_1, \dots, \delta_{l-1}]] + 0 \\
&= \sum_{l=1}^k \alpha_l^2 \sigma^2.
\end{aligned}$$

□

The consequence of this lemma is that we are able to treat  $\delta_1, \dots, \delta_k$  as if they are independent, even though they are not—clearly  $\delta_l$  is dependent on  $\delta_1, \dots, \delta_{l-1}$  through  $x_l$ . By Lemma B.16, we can compute the variance of momentum  $m_t$ ,

$$\begin{aligned}
\text{var}(m_t) &= (1 - \beta_2)^2 \mathbb{E}\left\|\sum_{i=1}^t \beta_2^{t-i} \delta_i\right\|^2 \\
&= (1 - \beta_2)^2 \mathbb{E}\sum_{i=1}^t \beta_2^{2t-2i} \|\delta_i\|^2 \\
&= \frac{(1 - \beta_2)v_{max}}{(1 + \beta_2)n_{batch}}
\end{aligned}$$

## B.12 ANALYSIS WITH STOCHASTIC GRADIENT LION

**Theorem B.17.** *Under the assumptions delineated in B.13 and B.12, consider a function  $f: \mathbb{R}^d \rightarrow \mathbb{R}$  that is  $L$ -smooth. Consider the following scheme:*

$$\begin{aligned}
m_{t+1} &= \beta_2 m_t - (1 - \beta_2) g_t \\
\tilde{m}_{t+1} &= \beta_1 m_t - (1 - \beta_1) g_t \\
x_{t+1} &= x_t + \epsilon(\text{sign}(\tilde{m}_{t+1}) - \lambda x_{t+1}),
\end{aligned} \tag{43}$$

where  $g_t = \nabla f(x_t; \xi_t)$  as shown in B.13,  $m_0, g_1, \dots, g_t, \dots$  are random variables with  $\mathbb{E}[g_t] = \nabla f(x_t)$ ,  $\beta_1, \beta_2 \in (0, 1)$ , and  $\beta_2 > \beta_1$ , and  $\epsilon, \lambda > 0$ .

Define the following Lyapunov function:

$$H(x, m) = f(x) + \frac{1}{\lambda} \|\lambda x\|^* + \frac{\beta_1}{\epsilon \lambda (1 - \beta_1) + (1 - \beta_2)} (\|\lambda x\|^* + \|m\| - \lambda x^\top m),$$

and

$$\begin{aligned}
\Delta_t^1 &= (\text{sign}(\tilde{m}_{t+1}) - \lambda x_{t+1})^\top (\tilde{m}_{t+1} - \text{sign}^*(\lambda x_{t+1})), \\
\Delta_t^2 &= (\text{sign}(\tilde{m}_{t+1}) - \text{sign}(m_{t+1}))^\top (\tilde{m}_{t+1} - m_{t+1}),
\end{aligned}$$

where  $\text{sign}^*$  is a subgradient of  $\mathcal{K}^*$ . Then we have  $\Delta_t^1 \geq 0$  and  $\Delta_t^2 \geq 0$  from Lemma B.9, and

$$\mathbb{E}[H(x_{t+1}, m_{t+1}) - H(x_t, m_t)] \leq \mathbb{E} \left[ -\epsilon(a\Delta_t^1 + b\Delta_t^2) + \frac{L\epsilon^2}{2} \|\text{sign}(\tilde{m}_{t+1}) - \lambda x_{t+1}\|_2^2 \right] + \epsilon \frac{1}{1 + \lambda\epsilon} \frac{\sqrt{d \cdot v_{max}}}{\sqrt{n_{batch}}}$$

where

$$a = \frac{\epsilon\lambda\beta_1}{\epsilon\lambda(1 - \beta_1) + (1 - \beta_2)} + 1 \geq 0, \quad b = \frac{\beta_1(1 - \beta_2)}{(\beta_2 - \beta_1)(\epsilon\lambda(1 - \beta_1) + (1 - \beta_2))} \geq 0.$$

$v_{max}, n_{batch}$  are defined in B.12

Hence, a telescoping sum yields

$$\frac{1}{T} \sum_{t=0}^{T-1} \mathbb{E}[a\Delta_t^1 + b\Delta_t^2] \leq \mathbb{E} \left[ \frac{H(x_0, m_0) - H(x_T, m_T)}{\epsilon T} + \frac{L\epsilon}{2} B_t + \frac{1}{1 + \lambda\epsilon} \frac{\sqrt{d \cdot v_{max}}}{\sqrt{n_{batch}}} \right],$$

$$\text{where } B_t = \frac{1}{T} \sum_{t=1}^T \|\text{sign}(\tilde{m}_{t+1}) - \lambda x_{t+1}\|_2^2$$

*Proof.* Define

$$H(x, m) = (a - c)f(x) + \frac{a}{\lambda} \|\lambda x\|^* + \frac{c}{\lambda} \|m\| - cx^\top m, \quad \text{with } c = (a + b)\beta_1 - b\beta_2,$$

where

$$a = \frac{\epsilon\lambda\beta_1}{\epsilon\lambda(1 - \beta_1) + (1 - \beta_2)} + 1 \geq 0, \quad b = \frac{\beta_1(1 - \beta_2)}{(\beta_2 - \beta_1)(\epsilon\lambda(1 - \beta_1) + (1 - \beta_2))} \geq 0, \quad c = a - 1.$$

By the definition of  $\Delta_t^1, \Delta_t^2$ , we have

$$\begin{aligned} & a\Delta_t^1 + b\Delta_t^2 \\ &= a(\text{sign}(\tilde{m}_{t+1}) - \lambda x_{t+1})^\top (\tilde{m}_{t+1} - \text{sign}^*(\lambda x_{t+1})) \\ &\quad + b(\text{sign}(\tilde{m}_{t+1}) - \text{sign}(m_{t+1}))^\top (\tilde{m}_{t+1} - m_{t+1}) \\ &= (\text{sign}(\tilde{m}_{t+1}) - \lambda x_{t+1})^\top (a(\text{sign}^*(\lambda x_{t+1}) - \tilde{m}_{t+1}) + b(\tilde{m}_{t+1} - m_{t+1})) \\ &\quad + b(\text{sign}(m_{t+1}) - \lambda x_{t+1})^\top (m_{t+1} - \tilde{m}_{t+1}) \\ &= -(\text{sign}(\tilde{m}_{t+1}) - \lambda x_{t+1})^\top (a\text{sign}^*(\lambda x_{t+1}) - ((a + b)\beta_1 - b\beta_2)m_t + (a - (a + b)\beta_1 + b\beta_2)\nabla f(x_t)) \\ &\quad - b \frac{\beta_2 - \beta_1}{1 - \beta_2} \frac{\lambda}{c} \left( \frac{c}{\lambda} \text{sign}(m_{t+1}) - cx_{t+1} \right)^\top (m_{t+1} - m_t) \\ &= -[(a - c)g_t + a\text{sign}^*(\lambda x_{t+1}) - cm_t]^\top (\text{sign}(\tilde{m}_{t+1}) - \lambda x_{t+1}) \\ &\quad - \frac{1}{\epsilon} \left[ \frac{c}{\lambda} \text{sign}(m_{t+1}) - cx_{t+1} \right]^\top (m_{t+1} - m_t) \\ &= -\frac{1}{\epsilon} [(a - c)g_t + a\text{sign}^*(\lambda x_{t+1}) - cm_t]^\top (x_{t+1} - x_t) \\ &\quad - \frac{1}{\epsilon} \left[ \frac{c}{\lambda} \text{sign}(m_{t+1}) - cx_{t+1} \right]^\top (m_{t+1} - m_t) \end{aligned} \tag{44}$$

By Lemma B.9,

$$H(x_{t+1}, m_{t+1}) - H(x_t, m_t) \leq \hat{\nabla}_x H_t^\top (x_{t+1} - x_t) + \hat{\nabla}_m H_t^\top (m_{t+1} - m_t) + \frac{L}{2} \|x_{t+1} - x_t\|_2^2,$$

where

$$\begin{aligned} \hat{\nabla}_x H_t &= (a - c)\nabla f(x_t) + a\text{sign}^*(\lambda x_{t+1}) - cm_t, \\ \hat{\nabla}_m H_t &= \frac{c}{\lambda} \text{sign}(m_{t+1}) - cx_{t+1} = \frac{c}{\epsilon\lambda} (\hat{V}_{x,t} - \text{sign}(\tilde{m}_{t+1}) + \text{sign}(m_{t+1})) \end{aligned}$$

with

$$\begin{aligned}
V_{x,t} &= x_{t+1} - x_t = \epsilon(\text{sign}(\tilde{m}_{t+1}) - \lambda x_{t+1}) \\
V_{m,t} &= m_{t+1} - m_t = -(1 - \beta_2)(g_t - m_t) \\
\tilde{m}_{t+1} - m_{t+1} &= -(\beta_2 - \beta_1)(g_t - m_t) = -(\beta_2 - \beta_1)V_{m,t} \\
\hat{V}_{m,t} &= -\text{sign}(\tilde{m}_{t+1}) + \text{sign}(m_{t+1})
\end{aligned}$$

This gives

$$\begin{aligned}
&H(x_{t+1}, m_{t+1}) - H(x_t, m_t) \\
&\leq \hat{V}_x H_t^\top (x_{t+1} - x_t) + \hat{V}_m H_t^\top (m_{t+1} - m_t) + \frac{L}{2} \|x_{t+1} - x_t\|_2^2
\end{aligned}$$

Hence,

$$\begin{aligned}
H(x_{t+1}, m_{t+1}) - H(x_t, m_t) &\leq [(a - c)\nabla f(x_t) + a\text{sign}^*(\lambda x_{t+1}) - cm_t]^\top (x_{t+1} - x_t) \\
&\quad + \left[\frac{c}{\lambda}\text{sign}(m_{t+1}) - cx_{t+1}\right]^\top (m_{t+1} - m_t) + \frac{L}{2} \|x_{t+1} - x_t\|_2^2 \\
&= [(a - c)g_t + a\text{sign}^*(\lambda x_{t+1}) - cm_t]^\top (x_{t+1} - x_t) \\
&\quad + \left[\frac{c}{\lambda}\text{sign}(m_{t+1}) - cx_{t+1}\right]^\top (m_{t+1} - m_t) + \frac{L}{2} \|x_{t+1} - x_t\|_2^2 \\
&\quad + \epsilon(a - c)(\nabla f(x_t) - g_t)^\top (\text{sign}(\tilde{m}_{t+1}) - \lambda x_{t+1}) \\
&= -\epsilon(a\Delta_t^1 + b\Delta_t^2) + \frac{L}{2} \|x_{t+1} - x_t\|_2^2 \quad //\text{by equation 44} \\
&\quad + \epsilon(a - c)(\nabla f(x_t) - g_t)^\top (\text{sign}(\tilde{m}_{t+1}) - \lambda x_{t+1})
\end{aligned}$$

It suffices to bound  $\mathbb{E} [(\nabla f(x_t) - g_t)^\top (\text{sign}(\tilde{m}_{t+1}) - \lambda x_{t+1})]$ .

Note that

$$\begin{aligned}
&\mathbb{E} [(\nabla f(x_t) - g_t)^\top (\text{sign}(\tilde{m}_{t+1}) - \lambda x_{t+1})] \\
&= \mathbb{E} \left[ (\nabla f(x_t) - g_t)^\top \left( \frac{1}{1 + \lambda\epsilon} \text{sign}(\tilde{m}_{t+1}) - \frac{\lambda}{1 + \lambda\epsilon} x_t \right) \right] \\
&= \frac{1}{1 + \lambda\epsilon} \mathbb{E} [(\nabla f(x_t) - g_t)^\top \text{sign}(\tilde{m}_{t+1})] + \frac{\lambda}{1 + \lambda\epsilon} \mathbb{E} [(\nabla f(x_t) - g_t)^\top x_t]
\end{aligned}$$

By Assumption B.13,

$$\begin{aligned}
\mathbb{E} [(\nabla f(x_t) - g_t)^\top \lambda x_t] &= \lambda \mathbb{E}_{x_t} [\mathbb{E}_{\xi_t} [(\nabla f(x_t) - \nabla f(x_t, \xi_t))^\top x_t \mid x_t]] \\
&= 0 \quad //\text{by B.13 } \mathbb{E}[\nabla f(x, \xi)] = \nabla f(x)
\end{aligned}$$

Next, we can use B.18 to bound  $\mathbb{E} [(\nabla f(x_t) - g_t)^\top \text{sign}(\tilde{m}_{t+1})]$ .

$$\begin{aligned}
\mathbb{E} [(\nabla f(x_t) - g_t)^\top \text{sign}(\tilde{m}_{t+1})] &= \mathbb{E} [(\nabla f(x_t) - g_t)^\top \text{sign}(\beta_1 m_t - (1 - \beta_1)g_t)] \\
&\leq \sqrt{d \cdot \text{var}(g_t)} \quad //\text{by B.18} \\
&\leq \sqrt{\frac{d \cdot v_{max}}{n_{batch}}} \quad //\text{by B.12}
\end{aligned}$$

Hence,

$$\begin{aligned}
&\mathbb{E} [(\nabla f(x_t) - g_t)^\top (\text{sign}(\tilde{m}_{t+1}) - \lambda x_{t+1})] \\
&= \frac{1}{1 + \lambda\epsilon} \mathbb{E} [(\nabla f(x_t) - g_t)^\top \text{sign}(\tilde{m}_{t+1})] + \frac{\lambda}{1 + \lambda\epsilon} \mathbb{E} [(\nabla f(x_t) - g_t)^\top x_{t+1}] \\
&\leq \frac{1}{1 + \lambda\epsilon} \sqrt{\frac{d \cdot v_{max}}{n_{batch}}}
\end{aligned}$$

□

---

**Lemma B.18.** *Let  $X, Y$  be two  $\mathbb{R}^d$ -valued random variables with  $\text{var}(Y) < +\infty$ , and assume  $\mathcal{K}$  yields a weak derivative  $\text{sign}$ . We have  $\mathbb{E}[(Y - \mathbb{E}Y)^\top \text{sign}(X + \epsilon Y)] \leq \sqrt{d \text{var}(Y)}$*

*Proof.*

$$\mathbb{E}[(Y - \mathbb{E}[Y])^\top \text{sign}(X + \epsilon Y)] \leq \mathbb{E}[\|Y - \mathbb{E}[Y]\|] \leq \sqrt{d \cdot \mathbb{E}[\|Y - \mathbb{E}[Y]\|^2]} = \sqrt{d \cdot \text{var}(Y)}$$

□
